# Supplementary material
Source: publisher figshare collection journal article supplement (https://gsajournals.figshare.com/ndownloader/files/16979177)
Supplement: Supplementary file 1 [file 16979177]

## Sheet: Sheet1
	Flybase ID	Flybase Gene Symbol	CVAT summary statistic	nSNPs	P value
	FBgn0051119	HDAC11	11.5404	9	0.0024
	FBgn0011742	Arp2	46.3466	59	0.0042
	FBgn0035511	Cpr64Ab	13.1441	12	0.0042
	FBgn0010246	Myo61F	150.924	270	0.0058
	FBgn0037262	MED31	4.88112	4	0.0071
	FBgn0035512	Cpr64Ac	19.1125	23	0.0075
	FBgn0016687	Nurf-38	11.6945	13	0.0089
	FBgn0003510	Sry-alpha	20.6322	27	0.0094
	FBgn0030159	CG9689	6.51341	6	0.0094
	FBgn0262139	trh	155.178	319	0.0098
	FBgn0034435	fest	27.8371	40	0.0099
	FBgn0032061	CG9314	33.6035	52	0.0102
	FBgn0005779	PpD6	18.3648	25	0.0112
	FBgn0039234	Nct	22.4522	30	0.0112
	FBgn0003462	Sod1	22.7375	33	0.0127
	FBgn0035568	CG18418	20.2989	28	0.0133
	FBgn0003557	Su(dx)	44.2427	76	0.0134
	FBgn0020235	ATPsyngamma	7.35737	9	0.0141
	FBgn0036717	CG13731	18.5065	27	0.0149
	FBgn0037093	Cdk12	15.2309	22	0.0164
	FBgn0051741	CG31741	11.8559	16	0.0169
	FBgn0034361	mRpS28	11.1815	15	0.0174
	FBgn0000047	Act88F	16.0474	24	0.0175
	FBgn0001087	g	57.0113	106	0.0175
	FBgn0037702	CG8176	31.5893	52	0.0176
	FBgn0026754	Ugt37c1	13.9123	20	0.0194
	FBgn0003888	betaTub60D	64.4592	130	0.0199
	FBgn0003513	ss	119.829	266	0.0202
	FBgn0041174	Vhl	4.26594	5	0.0208
	FBgn0035582	CG13705	7.73828	10	0.0218
	FBgn0030674	CG8184	33.7718	61	0.0229
	FBgn0038248	CG7886	113.115	258	0.0239
	FBgn0029006	Smurf	72.6141	157	0.0243
	FBgn0050115	GEFmeso	371.656	1029	0.025
	FBgn0022288	l(2)09851	7.67001	11	0.0253
	FBgn0011754	PhKgamma	20.0222	35	0.0275
	FBgn0033661	CG13185	103.275	239	0.0276
	FBgn0003944	Ubx	366.596	1022	0.0286
	FBgn0034246	Dcr-2	18.5321	33	0.029
	FBgn0034278	CG14488	7.39188	11	0.0297
	FBgn0000244	by	9.93106	16	0.0323
	FBgn0085308	CG34279	4.3477	6	0.0323
	FBgn0010348	Arf79F	5.40779	8	0.0324
	FBgn0012058	Cdc27	19.1221	35	0.0332
	FBgn0000541	E(bx)	3.11411	4	0.0341
	FBgn0003870	ttk	53.6442	116	0.0342
	FBgn0030539	CG1368	1.08227	1	0.0342
	FBgn0030066	Uros1	6.99081	11	0.0346
	FBgn0035510	Cpr64Aa	11.8442	20	0.0358
	FBgn0038200	CG9920	4.85757	7	0.0364
	FBgn0039246	CG10845	13.3905	23	0.0364
	FBgn0033296	Mal-A7	9.87927	17	0.0385
	FBgn0010194	Wnt5	10.7335	19	0.0403
	FBgn0010333	Rac1	7.80906	13	0.0418
	FBgn0025740	PlexB	3.5381	5	0.042
	FBgn0038607	hmw	11.5214	20	0.0422
	FBgn0039800	Npc2g	11.9681	22	0.0429
	FBgn0015589	Apc	105.202	269	0.0443
	FBgn0024238	Fim	79.2391	194	0.0444
	FBgn0033874	CG6347	37.5936	84	0.0445
	FBgn0035625	Blimp-1	115.469	297	0.0447
	FBgn0262739	AGO1	80.333	199	0.0447
	FBgn0010431	mtrm	13.2248	25	0.0449
	FBgn0035271	CG2021	3.96367	6	0.045
	FBgn0034882	Eglp1	16.9659	34	0.0467
	FBgn0032054	Uba4	1.54103	2	0.0472
	FBgn0030501	BthD	9.71448	18	0.0482
	FBgn0023143	Uba1	7.90526	14	0.0483
	FBgn0003189	r	55.2474	133	0.0491
	FBgn0003149	Prm	83.6664	214	0.0496
	FBgn0004436	Ubc6	4.31702	7	0.0497
	FBgn0035101	p130CAS	14.571	29	0.0498
	FBgn0050412	CG30412	9.2417	17	0.0498
	FBgn0015283	Rpn10	0.937437	1	0.05
	FBgn0040255	Ugt86De	16.79	34	0.0503
	FBgn0035978	UGP	65.2379	159	0.0517
	FBgn0000121	Arr2	19.3847	41	0.0539
	FBgn0035640	mad2	8.94842	17	0.0542
	FBgn0035122	mRpL17	1.52526	2	0.0552
	FBgn0020445	E23	135.638	372	0.0556
	FBgn0010622	DCTN3-p24	10.5474	20	0.0558
	FBgn0035124	ttm2	4.78582	8	0.0565
	FBgn0024332	Mcm3	18.2498	39	0.0566
	FBgn0013981	His4r	3.6744	6	0.0569
	FBgn0038706	CG3517	8.36762	16	0.0573
	FBgn0083956	CG34120	66.7719	170	0.0586
	FBgn0030697	CG8565	3.12841	5	0.0587
	FBgn0033856	CG13334	26.0021	58	0.0598
	FBgn0036381	CG8745	66.6515	169	0.0603
	FBgn0032691	Atac2	28.1734	67	0.061
	FBgn0028991	seq	54.1922	135	0.062
	FBgn0038773	CG10887	5.56304	10	0.0622
	FBgn0035817	CG7409	4.58629	8	0.0624
	FBgn0036735	Edc3	7.61433	15	0.0626
	FBgn0030869	Socs16D	19.8563	44	0.0627
	FBgn0004242	Syt1	140.695	397	0.0633
	FBgn0261387	CG17528	18.0791	41	0.0656
	FBgn0026418	Hsc70Cb	30.1274	71	0.0661
	FBgn0040368	eIF4E7	13.7599	29	0.0662
	FBgn0263602	Tasp1	6.16799	12	0.0686
	FBgn0024273	WASp	51.5597	131	0.0688
	FBgn0029079	icln	3.89833	7	0.069
	FBgn0015331	abs	0.774922	1	0.0696
	FBgn0001281	janB	7.37322	15	0.0697
	FBgn0033512	CG12902	6.14463	12	0.0701
	FBgn0005654	Orc3	23.1534	54	0.0709
	FBgn0011244	Hsp60B	14.0865	31	0.0713
	FBgn0004106	Cdk1	5.19761	10	0.0723
	FBgn0004381	Klp68D	23.9684	56	0.0723
	FBgn0259214	PMCA	27.6045	67	0.0731
	FBgn0259685	crb	101.237	282	0.0731
	FBgn0034863	SkpF	7.85789	16	0.0745
	FBgn0261556	CG42674	112.975	320	0.0745
	FBgn0034963	Not11	13.7664	31	0.075
	FBgn0034564	CG9344	9.78595	21	0.0751
	FBgn0033551	CG7222	8.50516	18	0.0754
	FBgn0085432	pan	27.532	67	0.0758
	FBgn0250788	beta-Spec	35.9156	91	0.0764
	FBgn0037860	CG6629	7.66327	16	0.0772
	FBgn0036490	CG6888	5.14362	10	0.0776
	FBgn0051025	Ppi1	31.4315	79	0.0783
	FBgn0034237	eIF3b	14.2233	33	0.0796
	FBgn0011741	Arp6	2.35172	4	0.0797
	FBgn0003429	slo	214.997	658	0.0803
	FBgn0040068	Vav	42.573	112	0.0803
	FBgn0263006	SERCA	28.4868	70	0.0804
	FBgn0025874	Meics	19.2454	46	0.0807
	FBgn0030321	CG1703	5.85189	12	0.081
	FBgn0003378	Sgs8	4.52362	9	0.0815
	FBgn0041210	HDAC4	109.776	316	0.0824
	FBgn0031941	ATPsynGL	6.2284	13	0.0829
	FBgn0031759	lid	35.7299	92	0.083
	FBgn0003366	sev	59.4226	161	0.0839
	FBgn0036973	Rbbp5	2.70135	5	0.0841
	FBgn0014189	Hel25E	24.1084	60	0.0843
	FBgn0002183	dre4	43.7814	115	0.0846
	FBgn0040273	Spt5	30.8725	79	0.0849
	FBgn0004859	ci	6.16723	13	0.0859
	FBgn0015774	NetB	201.78	628	0.0878
	FBgn0029659	CG16782	4.02068	8	0.0882
	FBgn0034907	CG5539	11.4269	27	0.0895
	FBgn0020493	Dad	41.1215	110	0.0902
	FBgn0040251	Ugt86Di	10.7811	25	0.0911
	FBgn0000575	emc	23.2398	58	0.0912
	FBgn0005624	Psc	84.2876	242	0.0913
	FBgn0065032	Arpc3B	9.87697	23	0.0915
	FBgn0004198	ct	123.54	368	0.0938
	FBgn0038122	CG8138	3.37846	7	0.095
	FBgn0036469	CG18649	2.12047	4	0.0955
	FBgn0003023	otu	11.6633	28	0.0957
	FBgn0039673	CG7568	16.419	41	0.0963
	FBgn0032664	Slc25A46b	3.34152	7	0.0973
	FBgn0025457	Bub3	9.93517	23	0.0985
	FBgn0032016	Mettl14	13.0315	32	0.0988
	FBgn0001208	Hn	28.2841	75	0.1013
	FBgn0028560	sut4	10.2251	25	0.1018
	FBgn0034662	CG13492	101.508	303	0.1029
	FBgn0003575	su(sable)	10.0806	24	0.1044
	FBgn0039703	CG7829	6.09988	14	0.1044
	FBgn0051226	CG31226	4.17548	9	0.105
	FBgn0000046	Act87E	10.2959	25	0.1055
	FBgn0031751	CG9016	7.22917	17	0.1058
	FBgn0036398	upSET	56.6451	162	0.1059
	FBgn0002570	Mal-A1	7.56416	18	0.1071
	FBgn0032026	CG7627	54.2438	155	0.1075
	FBgn0020762	Atet	100.22	303	0.1082
	FBgn0259979	CG17337	4.89407	11	0.1086
	FBgn0000253	Cam	98.2239	298	0.1088
	FBgn0087008	e(y)3	20.7074	55	0.1089
	FBgn0013263	Trl	27.1916	75	0.109
	FBgn0022160	Gpo1	33.6169	93	0.1106
	FBgn0025838	CG2652	6.33497	15	0.1112
	FBgn0040253	Ugt86Dg	11.1931	28	0.1115
	FBgn0030685	Graf	21.0873	57	0.1128
	FBgn0250789	alpha-Spec	49.5668	145	0.1136
	FBgn0033733	CG8834	11.3239	29	0.1141
	FBgn0026141	Cdlc2	3.5443	8	0.116
	FBgn0264694	mgr	2.32787	5	0.1163
	FBgn0029725	CG2871	1.04887	2	0.1167
	FBgn0001124	Got1	36.401	105	0.1202
	FBgn0003371	sgg	143.587	460	0.1209
	FBgn0067864	Patj	11.1247	29	0.1211
	FBgn0014143	croc	2.30297	5	0.1216
	FBgn0011745	Arp1	11.1841	29	0.1219
	FBgn0019643	AANAT1	59.8028	179	0.1222
	FBgn0042641	frc	13.5036	36	0.1222
	FBgn0028926	NC2beta	2.64349	6	0.1248
	FBgn0039977	CG17454	2.74477	6	0.125
	FBgn0035558	CG11357	48.9346	146	0.1251
	FBgn0003321	sbr	31.1191	88	0.1254
	FBgn0036980	RhoBTB	13.9614	38	0.1258
	FBgn0038197	foxo	175.343	576	0.1283
	FBgn0034663	CG4363	9.65041	25	0.1297
	FBgn0005633	fln	1.37733	3	0.13
	FBgn0027950	MBD-like	5.19949	13	0.1301
	FBgn0000581	E(Pc)	25.4994	73	0.1305
	FBgn0036531	CG6244	4.15951	10	0.1315
	FBgn0003567	su(Hw)	32.5274	95	0.1317
	FBgn0011661	Moe	119.234	379	0.1322
	FBgn0036214	CG7264	5.90215	15	0.133
	FBgn0020236	ATPCL	36.8565	110	0.1331
	FBgn0085436	Not1	10.7339	29	0.1346
	FBgn0031103	CG12679	2.1355	5	0.1352
	FBgn0041102	ocn	4.0917	10	0.1356
	FBgn0010217	ATPsynbeta	0.522978	1	0.1357
	FBgn0000442	Pkg21D	31.1663	91	0.1362
	FBgn0000617	e(y)1	2.89533	7	0.1366
	FBgn0035203	CG9149	10.0676	27	0.1372
	FBgn0040228	DCTN5-p25	8.45644	23	0.1408
	FBgn0263667	Lpt	27.6413	82	0.1409
	FBgn0010825	Gug	122.946	403	0.141
	FBgn0004403	RpS14a	1.33834	3	0.1416
	FBgn0015279	Pi3K92E	11.2463	31	0.1416
	FBgn0029783	Sirt4	4.72096	12	0.1431
	FBgn0034483	CG16894	7.28115	19	0.1432
	FBgn0034527	CG9945	8.13911	22	0.1432
	FBgn0004587	B52	12.5354	35	0.1442
	FBgn0026428	HDAC6	6.12857	16	0.1443
	FBgn0026777	Rad23	3.22244	8	0.1454
	FBgn0036687	CG6652	6.87925	18	0.146
	FBgn0028833	Dak1	3.18429	8	0.1465
	FBgn0038630	CG14305	4.65653	12	0.1467
	FBgn0263968	nonC	55.1952	171	0.1469
	FBgn0036300	Pmm2	8.08332	22	0.148
	FBgn0261854	aPKC	115.166	378	0.1482
	FBgn0002466	sti	40.7169	127	0.1498
	FBgn0038052	vrs	2.44001	6	0.1505
	FBgn0010269	Dsor1	9.89981	27	0.1509
	FBgn0002939	ninaD	2.07234	5	0.1512
	FBgn0035574	RhoGEF64C	574.966	2070	0.1517
	FBgn0014010	Rab5	27.8087	84	0.1537
	FBgn0027329	CCT6	11.7599	34	0.1555
	FBgn0028382	cyp33	4.1689	11	0.1567
	FBgn0031268	cold	9.48826	27	0.1572
	FBgn0015218	eIF4E1	10.9677	31	0.1575
	FBgn0261987	Pxt	12.5011	36	0.1575
	FBgn0085447	sif	396.012	1404	0.1597
	FBgn0034249	RhoGAP54D	10.657	31	0.1618
	FBgn0015805	HDAC1	20.4837	61	0.162
	FBgn0000015	Abd-B	133.878	450	0.1635
	FBgn0034970	yki	6.10765	17	0.1635
	FBgn0031668	CG31917	2.66507	7	0.1638
	FBgn0039411	dysf	86.3978	284	0.1641
	FBgn0050417	tbrd-3	3.3967	9	0.1644
	FBgn0004654	Pgd	4.0718	11	0.1651
	FBgn0037926	Elp1	8.38105	24	0.1651
	FBgn0259794	sinah	2.41397	6	0.1651
	FBgn0031347	CG10869	18.8867	57	0.1654
	FBgn0039147	CG10694	1.21369	3	0.1657
	FBgn0037643	ScsbetaA	8.08291	23	0.1661
	FBgn0032869	CG17470	5.76497	16	0.1664
	FBgn0004175	Mst84Dd	0.447674	1	0.1681
	FBgn0003515	st	18.7011	57	0.1684
	FBgn0002962	nos	8.67637	25	0.1689
	FBgn0035533	Cip4	204.742	709	0.1691
	FBgn0004172	Mst84Da	0.838743	2	0.1699
	FBgn0002789	Mp20	8.04339	23	0.17
	FBgn0261456	hpo	15.9237	48	0.1702
	FBgn0001105	Gbeta13F	4.63358	13	0.1717
	FBgn0023081	gek	24.6294	78	0.1741
	FBgn0030786	mRpL22	2.89364	8	0.1741
	FBgn0038127	CG8476	4.03015	11	0.1744
	FBgn0034472	CG8517	1.90073	5	0.1746
	FBgn0011273	Acam	2.24875	6	0.1751
	FBgn0032731	Swip-1	43.104	138	0.176
	FBgn0050430	CG30430	1.95315	5	0.1766
	FBgn0039518	CG13978	17.0687	52	0.1768
	FBgn0015925	csul	8.04799	24	0.1776
	FBgn0039124	tbrd-1	6.98306	20	0.178
	FBgn0036828	CG6841	11.9042	36	0.1794
	FBgn0010435	emp	8.53866	25	0.1795
	FBgn0036747	CG6052	15.2437	47	0.1798
	FBgn0039067	wda	22.9156	73	0.1799
	FBgn0003206	Ras64B	5.9417	17	0.1802
	FBgn0262081	Csk	44.256	144	0.1805
	FBgn0000216	Brd	3.31532	9	0.1806
	FBgn0030247	CG15208	2.24544	6	0.1807
	FBgn0047351	CG31468	2.26737	6	0.1813
	FBgn0261955	kdn	43.1419	141	0.1815
	FBgn0260780	wisp	10.8885	33	0.1823
	FBgn0003514	sqh	10.556	32	0.1828
	FBgn0033208	mRpL52	2.58344	7	0.1828
	FBgn0003134	Pp1alpha-96A	8.09466	24	0.184
	FBgn0003175	px	354.674	1284	0.1845
	FBgn0260444	Not10	3.53316	10	0.1845
	FBgn0027526	Ublcp1	6.45477	19	0.1863
	FBgn0263933	ebi	4.5118	13	0.1871
	FBgn0043001	Chrac-16	3.18788	9	0.1876
	FBgn0039691	IntS11	13.0754	41	0.188
	FBgn0030788	Sap30	5.47601	16	0.1904
	FBgn0038576	Arp5	9.52983	29	0.1917
	FBgn0051244	CG31244	3.37307	10	0.1917
	FBgn0020371	Tim17b2	2.10019	6	0.1921
	FBgn0037579	COX7AL	1.15355	3	0.1923
	FBgn0037700	CG8149	1.13892	3	0.1924
	FBgn0035218	CG9173	21.0668	68	0.1925
	FBgn0026056	Rlip	6.7346	20	0.1933
	FBgn0037828	tomboy20	0.406449	1	0.1935
	FBgn0040396	CG3939	3.46636	10	0.1935
	FBgn0033893	CG18371	1.48005	4	0.1938
	FBgn0262559	Mdh2	15.3611	49	0.1943
	FBgn0033067	CG11211	1.79751	5	0.195
	FBgn0041707	7B2	1.1115	3	0.195
	FBgn0033212	LRR	89.98	310	0.1952
	FBgn0029947	CG1999	0.759112	2	0.1954
	FBgn0003254	rib	39.4409	132	0.1961
	FBgn0026787	Nhe1	3.71429	11	0.1964
	FBgn0031710	Vps52	21.0633	68	0.1968
	FBgn0035198	CG9133	30.5827	101	0.1973
	FBgn0052672	Atg8a	1.09327	3	0.1979
	FBgn0014006	Ask1	19.3375	63	0.199
	FBgn0030394	Cpr11A	11.8344	37	0.1992
	FBgn0052246	CG32246	6.78807	21	0.2015
	FBgn0020653	Trxr-1	11.7164	37	0.2033
	FBgn0003044	Pcl	13.4769	43	0.2045
	FBgn0037463	djl	1.4478	4	0.2051
	FBgn0000163	baz	132.655	467	0.2054
	FBgn0086694	Bre1	17.7351	58	0.2055
	FBgn0043012	AP-2sigma	2.0486	6	0.2066
	FBgn0041147	ida	11.8488	38	0.2072
	FBgn0033953	CG12861	8.34662	26	0.2081
	FBgn0020496	CtBP	22.2936	74	0.2087
	FBgn0039066	EloA	15.8977	52	0.209
	FBgn0035087	CG2765	4.56911	14	0.2094
	FBgn0035380	CG9970	10.6769	34	0.2094
	FBgn0003377	Sgs7	0.711583	2	0.2111
	FBgn0036196	CG11658	64.0625	221	0.2112
	FBgn0003448	sna	8.92384	29	0.2118
	FBgn0086355	Tpi	6.72796	21	0.212
	FBgn0033543	CG12338	4.81634	15	0.2124
	FBgn0025825	HDAC3	1.06846	3	0.2126
	FBgn0040747	CG12853	2.92736	9	0.2135
	FBgn0031873	Gas41	6.65229	21	0.2143
	FBgn0004419	me31B	3.60383	11	0.2154
	FBgn0034263	CG10934	2.63198	8	0.2162
	FBgn0037191	CG14448	0.354894	1	0.2164
	FBgn0000283	Cp190	5.79475	18	0.2165
	FBgn0010215	alpha-Cat	15.94	52	0.2165
	FBgn0003091	Pkc53E	134.491	484	0.2172
	FBgn0028381	Decay	14.6859	48	0.2175
	FBgn0040256	Ugt86Dd	5.66778	18	0.2175
	FBgn0086346	ALiX	13.489	44	0.2196
	FBgn0037915	CG6790	7.92581	26	0.2197
	FBgn0000241	bw	18.5064	62	0.2206
	FBgn0000042	Act5C	4.16744	13	0.2211
	FBgn0052445	CG32445	2.27152	7	0.2211
	FBgn0030093	Bap111	7.54077	24	0.2218
	FBgn0034200	Gbp2	13.1736	43	0.222
	FBgn0003676	CCT1	1.67874	5	0.2221
	FBgn0034661	CG4386	6.29733	20	0.2225
	FBgn0034840	CG3124	8.3454	27	0.2225
	FBgn0031220	CG4822	4.11421	13	0.2227
	FBgn0039562	Gp93	15.4578	52	0.2232
	FBgn0003076	Pgm1	6.04134	19	0.2233
	FBgn0035197	CG9130	34.8256	120	0.2233
	FBgn0035161	CG13898	2.87828	9	0.2235
	FBgn0039088	CG10164	5.93742	19	0.2242
	FBgn0036415	CG7768	1.01939	3	0.2244
	FBgn0261534	l(2)34Fc	13.9555	46	0.2253
	FBgn0004050	z	8.05423	26	0.227
	FBgn0036327	CG10748	6.54648	21	0.2276
	FBgn0031037	CG14207	15.0731	50	0.228
	FBgn0000139	ash2	18.3474	62	0.2289
	FBgn0050456	CG30456	40.5421	142	0.2295
	FBgn0001168	h	11.3611	38	0.2299
	FBgn0037086	CG7202	1.95418	6	0.2309
	FBgn0045843	RacGAP84C	1.31689	4	0.2309
	FBgn0035007	CG3492	5.8375	19	0.231
	FBgn0032076	Argl	17.9307	61	0.2313
	FBgn0004581	bgcn	18.0464	62	0.2316
	FBgn0016013	Faa	17.9553	62	0.2325
	FBgn0010812	unc-45	9.56947	32	0.2342
	FBgn0036082	CG12362	7.185	24	0.2345
	FBgn0036004	Jarid2	53.4397	191	0.2363
	FBgn0029512	Aos1	0.32605	1	0.237
	FBgn0028684	Rpt5	4.3047	14	0.2383
	FBgn0000212	brm	42.1015	148	0.239
	FBgn0027873	Cpsf100	3.08846	10	0.2401
	FBgn0014011	Rac2	5.39972	18	0.2403
	FBgn0023179	amon	78.9036	287	0.2424
	FBgn0030434	Brms1	1.27768	4	0.2427
	FBgn0004404	RpS14b	0.962096	3	0.244
	FBgn0035357	MEP-1	48.7109	174	0.2442
	FBgn0086356	tum	10.2125	35	0.2455
	FBgn0035782	CG14835	3.05048	10	0.2461
	FBgn0003374	Sgs4	6.5744	22	0.2463
	FBgn0004397	Vinc	12.4558	43	0.2466
	FBgn0037371	Sym	2.78044	9	0.2468
	FBgn0010423	TpnC47D	6.56264	22	0.2475
	FBgn0001259	in	7.65239	26	0.2476
	FBgn0026375	RhoGAPp190	22.9379	81	0.2476
	FBgn0010341	Cdc42	3.3757	11	0.2479
	FBgn0004687	Mlc-c	10.9673	37	0.2486
	FBgn0003900	twi	11.0493	38	0.2498
	FBgn0046214	vig2	2.77746	9	0.2512
	FBgn0038225	soti	1.52537	5	0.2521
	FBgn0038539	Atg8b	1.51476	5	0.2529
	FBgn0035272	mRpL46	3.32622	11	0.2534
	FBgn0035551	CG7465	3.91298	13	0.2538
	FBgn0034082	CG10734	7.00974	24	0.2542
	FBgn0032684	CG10178	20.6334	73	0.2546
	FBgn0037912	sea	12.0077	41	0.2548
	FBgn0003862	trx	64.9878	240	0.2564
	FBgn0004360	Wnt2	33.7194	122	0.2574
	FBgn0085197	CG34168	4.35124	15	0.259
	FBgn0031298	Atg4a	15.9688	57	0.2591
	FBgn0083981	RunxA	129.565	487	0.26
	FBgn0031692	TpnC25D	4.43153	15	0.2607
	FBgn0046222	Wdr33	2.66103	9	0.2612
	FBgn0031940	CG7214	3.50536	12	0.2627
	FBgn0035848	Uxs	6.30728	22	0.2631
	FBgn0019968	Khc-73	66.1525	243	0.2637
	FBgn0000045	Act79B	1.21473	4	0.2639
	FBgn0010750	atms	26.1529	95	0.2649
	FBgn0004666	sim	85.4355	315	0.2652
	FBgn0015924	crq	5.05999	18	0.2657
	FBgn0038281	RpL10Aa	3.5003	12	0.2663
	FBgn0035005	CG3483	3.21317	11	0.2669
	FBgn0011569	can	14.9535	54	0.2686
	FBgn0034416	CG15109	4.54184	16	0.2697
	FBgn0086908	egg	1.99995	7	0.272
	FBgn0000395	cv-2	143.329	543	0.2721
	FBgn0003885	alphaTub84D	1.17997	4	0.2721
	FBgn0001285	Jon44E	0.883524	3	0.2736
	FBgn0010313	corto	5.65926	20	0.2741
	FBgn0002865	Mst98Ca	1.44396	5	0.2745
	FBgn0022344	CG10340	2.03901	7	0.275
	FBgn0036441	CG13476	0.276433	1	0.2751
	FBgn0002576	lz	74.8409	280	0.2769
	FBgn0036729	CG13733	2.56439	9	0.277
	FBgn0015321	Ubc4	3.15996	11	0.2779
	FBgn0004595	pros	139.419	532	0.2781
	FBgn0045073	Stim	7.22943	26	0.2783
	FBgn0020655	ArfGAP1	8.04828	29	0.2789
	FBgn0031604	Elp3	6.39989	23	0.2804
	FBgn0039890	CG2316	7.16015	26	0.2804
	FBgn0003731	Egfr	232.981	893	0.2805
	FBgn0010762	simj	131.505	498	0.2818
	FBgn0022338	dnk	6.07986	22	0.282
	FBgn0051121	CG31121	55.6182	209	0.2823
	FBgn0044452	Atg2	24.698	92	0.2824
	FBgn0040261	Ugt36Bb	10.2396	37	0.2825
	FBgn0033901	O-fut1	1.92598	7	0.2838
	FBgn0034497	Mpcp1	14.7065	54	0.2846
	FBgn0020388	Gcn5	9.619	35	0.2851
	FBgn0032956	Cul2	3.03374	11	0.2851
	FBgn0003093	Pkc98E	25.8546	96	0.2855
	FBgn0040519	CG15219	1.12955	4	0.2864
	FBgn0004372	aly	9.11057	33	0.2871
	FBgn0051538	CG31538	1.98911	7	0.2884
	FBgn0264089	sli	212.858	826	0.2885
	FBgn0000578	ena	111.525	427	0.2899
	FBgn0033969	Pgm2b	16.8197	62	0.29
	FBgn0015664	Dref	12.546	46	0.2901
	FBgn0003889	betaTub85D	2.2604	8	0.2906
	FBgn0038423	CG10317	5.22587	19	0.2916
	FBgn0038058	CG5608	2.49289	9	0.2921
	FBgn0000557	eEF1alpha2	7.10489	26	0.2929
	FBgn0031458	aph-1	4.683	17	0.2929
	FBgn0003285	rst	31.2808	117	0.2933
	FBgn0026577	CG8677	7.73535	29	0.2936
	FBgn0264560	garz	17.2676	64	0.2958
	FBgn0000120	Arr1	5.37779	20	0.297
	FBgn0023395	Chd3	2.75976	10	0.297
	FBgn0263930	dally	387.318	1519	0.2982
	FBgn0039887	CG2053	1.36225	5	0.3003
	FBgn0027291	Idh3a	9.87467	37	0.3022
	FBgn0038774	CG5023	21.7787	82	0.3023
	FBgn0010225	Gel	1.87332	7	0.303
	FBgn0003607	Su(var)205	2.6916	10	0.3039
	FBgn0035918	Cdc6	15.9059	60	0.3041
	FBgn0035384	CG2113	6.06919	23	0.3057
	FBgn0086532	Spt-I	11.3542	43	0.3057
	FBgn0024956	Mat1	2.99029	11	0.3058
	FBgn0031377	CG15356	23.4051	90	0.3062
	FBgn0038294	Mf	38.2618	147	0.3066
	FBgn0037891	CG5214	4.77561	18	0.3071
	FBgn0036762	CG7430	2.14668	8	0.3072
	FBgn0022355	Tsf1	5.81027	22	0.3077
	FBgn0037988	CG14740	3.67059	14	0.3084
	FBgn0260771	Larp7	1.3452	5	0.3086
	FBgn0028325	Pdha	7.72315	29	0.3089
	FBgn0259795	loopin-1	9.72901	37	0.309
	FBgn0028870	CG4691	2.88859	11	0.3103
	FBgn0263102	psq	234.192	921	0.3118
	FBgn0026479	Drp1	24.402	93	0.3119
	FBgn0263316	Mrp4	17.3302	66	0.3119
	FBgn0034651	CG15676	2.62098	10	0.3134
	FBgn0023508	Ocrl	6.86107	26	0.3142
	FBgn0037461	CG15177	1.04844	4	0.3143
	FBgn0046294	CG12699	2.3934	9	0.3147
	FBgn0262733	Src64B	169.982	672	0.3161
	FBgn0025800	Smox	1.30298	5	0.3162
	FBgn0035374	mRpS35	4.44517	17	0.3163
	FBgn0053519	Unc-89	94.2073	368	0.3165
	FBgn0032219	CG4995	12.7969	49	0.3167
	FBgn0031171	CG1801	26.0733	100	0.3172
	FBgn0034317	CG14499	2.0498	8	0.3179
	FBgn0031451	CG9961	13.2676	51	0.3186
	FBgn0015773	NetA	183.553	723	0.3201
	FBgn0041775	tral	12.557	48	0.3209
	FBgn0033206	DCTN4-p62	2.33317	9	0.3222
	FBgn0031118	RhoGAP19D	112.096	439	0.3224
	FBgn0036723	CG12229	2.81958	11	0.3226
	FBgn0003373	Sgs3	1.00522	4	0.3236
	FBgn0004170	sc	0.773986	3	0.3238
	FBgn0015550	tap	5.77588	22	0.3246
	FBgn0036974	eRF1	4.89665	19	0.3246
	FBgn0019828	dj	2.35236	9	0.3249
	FBgn0052081	CG32081	8.70641	34	0.3265
	FBgn0038827	Fancd2	21.4863	84	0.327
	FBgn0052459	CG32459	1.00479	4	0.3272
	FBgn0032111	CG13110	2.29724	9	0.3278
	FBgn0037659	Kdm2	17.83	70	0.3281
	FBgn0010416	TH1	9.17371	36	0.3284
	FBgn0036394	CG9040	4.87188	19	0.3319
	FBgn0028737	eEF1beta	0.752177	3	0.3322
	FBgn0000520	dwg	6.90778	27	0.3341
	FBgn0086442	mib2	10.4661	41	0.3358
	FBgn0260972	alc	6.59323	26	0.336
	FBgn0030951	CG6873	0.215739	1	0.3374
	FBgn0004380	Klp64D	13.1054	52	0.3377
	FBgn0034646	Rae1	3.76726	15	0.3383
	FBgn0023212	EloB	3.02543	12	0.3388
	FBgn0015621	Clp	2.50803	10	0.339
	FBgn0261573	CoRest	14.1338	56	0.3401
	FBgn0000319	Chc	7.80542	31	0.3403
	FBgn0260442	rhea	189.396	759	0.3404
	FBgn0032216	Usp14	13.0978	52	0.3432
	FBgn0031908	CG5177	21.1173	84	0.3435
	FBgn0000658	fj	9.81374	39	0.3451
	FBgn0032030	Wdr82	1.96442	8	0.3465
	FBgn0040813	Nplp2	3.19697	13	0.3467
	FBgn0262166	calypso	8.2166	33	0.3478
	FBgn0031305	Iris	10.217	41	0.3481
	FBgn0010424	TpnC73F	6.48717	26	0.3487
	FBgn0030486	Set2	18.0807	72	0.3498
	FBgn0015609	CadN	414.111	1686	0.3501
	FBgn0051624	CG31624	0.962292	4	0.3506
	FBgn0004908	Arl2	1.71733	7	0.3511
	FBgn0031069	Pmp70	23.4711	95	0.3519
	FBgn0039687	Naa40	6.13877	25	0.3524
	FBgn0011817	nmo	367.127	1490	0.3525
	FBgn0260049	flr	6.36228	26	0.3528
	FBgn0031601	Dim1	5.92823	24	0.354
	FBgn0001122	Galphao	141.799	575	0.3541
	FBgn0033667	reb	32.3308	131	0.3544
	FBgn0033442	CG1690	0.941204	4	0.3556
	FBgn0039244	CG11069	16.185	66	0.3556
	FBgn0036332	CG11261	7.15582	29	0.3558
	FBgn0014127	barr	4.58888	19	0.3564
	FBgn0010278	Ssrp	9.58841	39	0.3567
	FBgn0032089	Rcd-1r	5.67552	23	0.3578
	FBgn0037422	Osi13	1.89363	8	0.3597
	FBgn0028683	spt4	2.6326	11	0.3603
	FBgn0261933	SmD1	6.64709	27	0.3603
	FBgn0038697	CG3581	2.37015	10	0.3606
	FBgn0000116	Argk	78.1132	317	0.362
	FBgn0027580	PCB	27.2945	111	0.3625
	FBgn0040393	CG14265	0.697728	3	0.3645
	FBgn0033028	CG11665	17.7153	72	0.3651
	FBgn0034826	CG13544	6.80292	28	0.3653
	FBgn0037573	CG7483	1.62373	7	0.3653
	FBgn0028427	Ilk	0.936153	4	0.367
	FBgn0031859	CG17377	4.02798	17	0.3671
	FBgn0038344	obe	14.993	62	0.3673
	FBgn0000318	cl	5.11625	21	0.368
	FBgn0040505	Alk	52.8612	215	0.3694
	FBgn0033021	CG10417	4.23749	18	0.3698
	FBgn0004513	Mdr65	21.8462	90	0.3707
	FBgn0010453	Wnt4	106.42	434	0.371
	FBgn0005638	slbo	10.5116	43	0.3712
	FBgn0011656	Mef2	131.328	537	0.3712
	FBgn0037862	mAcon2	5.51441	23	0.3731
	FBgn0031456	Tnpo-SR	18.3009	76	0.374
	FBgn0026314	Ugt35b	4.97944	21	0.3741
	FBgn0004656	fs(1)h	34.6688	142	0.3753
	FBgn0031335	CG5565	4.02288	17	0.3772
	FBgn0037460	sowi	1.35974	6	0.3773
	FBgn0038320	Sra-1	9.7795	40	0.3775
	FBgn0052436	CG32436	9.00677	38	0.3806
	FBgn0025836	RhoGAP1A	4.45815	19	0.3811
	FBgn0032373	Vha100-5	19.9498	83	0.3812
	FBgn0086901	cv-c	400.792	1655	0.3814
	FBgn0039594	snu	79.9355	333	0.3827
	FBgn0031776	Pfdn1	1.12889	5	0.3832
	FBgn0010109	dpn	7.60185	32	0.3864
	FBgn0038210	CG3199	4.21376	18	0.3874
	FBgn0036471	CG13460	2.93434	13	0.3887
	FBgn0000499	dsh	1.10437	5	0.3898
	FBgn0003963	ush	240.153	1001	0.3901
	FBgn0000615	exu	3.16726	14	0.3902
	FBgn0036022	CG8329	5.10301	22	0.3905
	FBgn0025837	CG17636	0.162848	1	0.3916
	FBgn0086613	Ino80	132.416	550	0.3916
	FBgn0034835	CG3092	4.37823	19	0.3919
	FBgn0003326	sca	55.7898	233	0.3922
	FBgn0011278	lbe	13.0994	56	0.3924
	FBgn0262955	RpII140	17.2606	73	0.3924
	FBgn0026441	ear	2.71465	12	0.3925
	FBgn0034727	mRpS29	5.54579	24	0.3927
	FBgn0039511	CG3330	3.43615	15	0.3934
	FBgn0002736	mago	7.89661	34	0.3951
	FBgn0020621	Pkn	72.2636	301	0.3952
	FBgn0025455	CycT	4.80825	21	0.3952
	FBgn0027562	CG10345	9.22141	40	0.3961
	FBgn0026620	tacc	9.3838	40	0.3969
	FBgn0265297	pAbp	10.5786	45	0.3972
	FBgn0001139	gro	18.6408	79	0.3975
	FBgn0034173	CG9010	2.42088	11	0.3981
	FBgn0039258	beta4GalT7	4.11351	18	0.3991
	FBgn0039398	CG14540	4.55287	20	0.4001
	FBgn0033297	Mal-A8	4.09686	18	0.4014
	FBgn0039254	Nmnat	0.159763	1	0.4017
	FBgn0002868	MtnA	0.390861	2	0.4021
	FBgn0028690	Rpn5	0.607891	3	0.4022
	FBgn0034853	Ice1	17.1171	73	0.404
	FBgn0259228	C3G	61.4673	259	0.404
	FBgn0011725	twin	41.6329	176	0.4047
	FBgn0051948	CG31948	1.52745	7	0.4067
	FBgn0250903	lmgA	0.625998	3	0.4068
	FBgn0010213	Sod2	1.73468	8	0.4078
	FBgn0037834	Art1	1.26373	6	0.4078
	FBgn0052707	APC4	1.98156	9	0.4078
	FBgn0003449	snf	4.00888	18	0.4088
	FBgn0086347	Myo31DF	99.396	419	0.4108
	FBgn0024491	Bin1	1.71566	8	0.4119
	FBgn0000055	Adh	7.45493	33	0.4121
	FBgn0036663	CG9674	61.4705	261	0.413
	FBgn0039190	CG5762	1.02719	5	0.4143
	FBgn0015789	Rab10	6.05786	27	0.4148
	FBgn0016984	sktl	21.3011	92	0.4153
	FBgn0004657	mys	25.7311	111	0.4154
	FBgn0260003	Dys	635.759	2671	0.4165
	FBgn0040056	CG17698	7.06584	31	0.4169
	FBgn0035091	CG3829	4.23181	19	0.4174
	FBgn0029800	lin-52	0.147687	1	0.4179
	FBgn0036272	Sms	23.325	101	0.4201
	FBgn0031970	CG7227	20.8666	91	0.4217
	FBgn0038872	Nelf-A	12.2563	54	0.422
	FBgn0039169	Spps	4.60042	21	0.422
	FBgn0040362	CG11379	0.367796	2	0.4224
	FBgn0003391	shg	38.5671	166	0.4228
	FBgn0037616	CG8136	2.11884	10	0.4234
	FBgn0030086	CCT2	3.02288	14	0.4243
	FBgn0024846	p38b	0.566073	3	0.4245
	FBgn0036733	U4-U6-60K	2.59112	12	0.4246
	FBgn0003969	vap	9.88371	44	0.4247
	FBgn0036336	ste14	3.22485	15	0.425
	FBgn0036597	CG4962	2.09141	10	0.4255
	FBgn0039737	CG7920	20.8454	92	0.4261
	FBgn0012036	Aldh	24.3783	106	0.4262
	FBgn0262518	Rab8	4.16429	19	0.4264
	FBgn0005278	Sam-S	7.11548	32	0.4275
	FBgn0003132	Pp1-13C	3.70072	17	0.4284
	FBgn0035917	Zasp66	75.2589	325	0.4284
	FBgn0020307	dve	191.354	813	0.4286
	FBgn0034844	CG9861	10.761	48	0.4294
	FBgn0031091	Phf7	3.231	15	0.4299
	FBgn0004237	Hrb87F	4.97383	23	0.4306
	FBgn0033075	Pld	21.9251	96	0.4306
	FBgn0037375	kat-60L1	4.15774	19	0.4307
	FBgn0003886	alphaTub85E	0.976977	5	0.4327
	FBgn0031724	CG18266	3.67071	17	0.4336
	FBgn0001258	Ldh	14.3934	64	0.4339
	FBgn0032946	nrv3	13.8362	62	0.434
	FBgn0028949	CG15254	2.96878	14	0.4345
	FBgn0034204	CG10953	1.41466	7	0.4348
	FBgn0039994	conu	18.9623	84	0.4353
	FBgn0031969	pes	18.102	81	0.4377
	FBgn0038922	Idh3b	13.8998	62	0.4378
	FBgn0002922	nau	23.4284	104	0.4384
	FBgn0002869	MtnB	0.55983	3	0.4389
	FBgn0040260	Ugt36Bc	17.8875	79	0.4394
	FBgn0051870	CG31870	4.23346	20	0.4394
	FBgn0004569	aos	35.211	154	0.4397
	FBgn0033266	Socs44A	1.82101	9	0.4403
	FBgn0036085	CG6527	4.05578	19	0.4413
	FBgn0030975	SdhBL	2.02268	10	0.4421
	FBgn0005427	ewg	4.95522	23	0.4422
	FBgn0012051	CalpA	19.707	89	0.4422
	FBgn0040477	cid	3.54319	17	0.4423
	FBgn0001308	Khc	11.4312	52	0.4429
	FBgn0027378	MRG15	1.16984	6	0.4429
	FBgn0031410	CG17237	2.25011	11	0.4437
	FBgn0036372	Abp1	4.72709	22	0.4439
	FBgn0008651	lbl	113.354	492	0.4446
	FBgn0050376	CG30376	0.976396	5	0.4448
	FBgn0259935	CG42458	170.634	735	0.4454
	FBgn0035244	ABCB7	26.4336	118	0.4465
	FBgn0001197	His2Av	6.64496	31	0.4467
	FBgn0025802	Sbf	4.42799	21	0.4467
	FBgn0261067	LSm1	1.55717	8	0.4472
	FBgn0003041	pbl	93.1958	406	0.4475
	FBgn0003330	Sce	6.67911	31	0.4475
	FBgn0011771	Hem	0.952562	5	0.4483
	FBgn0035552	CG11350	4.72841	22	0.4483
	FBgn0014135	bnl	163.241	704	0.4488
	FBgn0020440	Fak	26.554	119	0.4495
	FBgn0004647	N	80.3861	349	0.45
	FBgn0034105	CG7755	6.84636	32	0.4503
	FBgn0034132	S-Lap8	8.1882	38	0.4503
	FBgn0004507	GlyP	16.7073	76	0.4504
	FBgn0051793	CG31793	10.1427	47	0.4507
	FBgn0040688	CG12483	0.323478	2	0.451
	FBgn0040208	Kat60	5.78832	27	0.4512
	FBgn0019637	Atu	0.738445	4	0.4515
	FBgn0015801	Reg-5	3.50757	17	0.4521
	FBgn0263512	Vsx2	109.559	476	0.4535
	FBgn0261439	SdhA	14.8086	68	0.4546
	FBgn0035143	Ppm1	4.20441	20	0.4552
	FBgn0029094	asf1	0.31766	2	0.4565
	FBgn0051792	CG31792	7.88161	37	0.4579
	FBgn0038853	RhoGAP93B	54.0795	238	0.4581
	FBgn0033056	CG7856	4.35271	21	0.4588
	FBgn0027841	CstF64	2.63987	13	0.4596
	FBgn0032749	Phlpp	5.28372	25	0.4598
	FBgn0030294	Pa1	7.69081	36	0.4601
	FBgn0013272	Gp150	38.1084	171	0.4612
	FBgn0037679	Aduk	4.73844	23	0.463
	FBgn0034802	CNBP	1.52179	8	0.4633
	FBgn0034537	DMAP1	11.9786	56	0.4634
	FBgn0243511	psidin	14.767	68	0.4635
	FBgn0010097	gammaTub37C	6.4735	31	0.4638
	FBgn0052082	IRSp53	204.363	888	0.4639
	FBgn0011672	Mvl	15.9426	74	0.4642
	FBgn0038860	Ice2	10.8116	51	0.4656
	FBgn0040565	CG7606	2.19661	11	0.4659
	FBgn0261396	Rpn3	2.18843	11	0.4662
	FBgn0001248	Idh	11.7115	55	0.4664
	FBgn0262519	Mi-2	23.5732	107	0.4675
	FBgn0259212	cno	52.4712	234	0.4692
	FBgn0036058	CG6707	8.20225	39	0.4695
	FBgn0040074	retinin	3.85163	19	0.4695
	FBgn0036147	Plod	50.8105	228	0.4711
	FBgn0036888	CG9330	1.31608	7	0.4712
	FBgn0037723	SpdS	2.16492	11	0.4717
	FBgn0005778	PpD5	8.79903	42	0.4744
	FBgn0039897	CG1674	5.81306	28	0.4745
	FBgn0264922	smt3	0.288504	2	0.4748
	FBgn0038467	AdSL	6.63336	32	0.4753
	FBgn0035008	CG3494	5.12858	25	0.4756
	FBgn0038325	Atg4b	4.68922	23	0.4758
	FBgn0040250	Ugt86Dj	6.44683	31	0.4758
	FBgn0038700	CG3734	7.76808	37	0.4764
	FBgn0033330	CG8746	1.0631	6	0.4773
	FBgn0259216	RhoGAP102A	4.70285	23	0.4778
	FBgn0000064	Ald1	19.1133	88	0.4781
	FBgn0038373	CG4546	1.07805	6	0.4794
	FBgn0002780	mod	1.07773	6	0.4795
	FBgn0030699	CG8578	3.16447	16	0.4813
	FBgn0034650	NC2alpha	1.26934	7	0.482
	FBgn0000043	Act42A	0.867731	5	0.4821
	FBgn0005671	Vha55	3.31251	17	0.4822
	FBgn0263979	Caf1-55	1.87657	10	0.4823
	FBgn0000119	arr	181.371	797	0.4831
	FBgn0001169	H	5.0421	25	0.4832
	FBgn0033527	CG11777	2.51139	13	0.4833
	FBgn0037770	Art4	0.87921	5	0.4839
	FBgn0051343	CG31343	10.4669	50	0.4848
	FBgn0263598	Vha68-2	13.5196	64	0.4857
	FBgn0024811	Crk	1.46176	8	0.4861
	FBgn0000044	Act57B	7.00947	34	0.4864
	FBgn0033027	TpnC4	16.3145	76	0.4879
	FBgn0036403	CG6661	3.27978	17	0.4885
	FBgn0261397	didum	6.71541	33	0.4886
	FBgn0265434	zip	25.8519	120	0.4888
	FBgn0000017	Abl	63.0633	286	0.4889
	FBgn0034240	MESR4	11.2439	54	0.489
	FBgn0035598	CG4669	9.74337	47	0.4898
	FBgn0034231	APC10	1.4333	8	0.4934
	FBgn0000384	cta	5.62865	28	0.4945
	FBgn0000405	CycB	6.81187	34	0.4949
	FBgn0011642	Zyx	1.61945	9	0.4964
	FBgn0061198	HSPC300	3.09592	16	0.4968
	FBgn0037396	CG11459	0.277172	2	0.4987
	FBgn0033341	MrgBP	1.44557	8	0.4991
	FBgn0263289	scrib	165.842	738	0.4994
	FBgn0001965	Sos	12.0511	58	0.5001
	FBgn0003687	Tbp	4.28027	22	0.5007
	FBgn0037279	CG1129	1.44359	8	0.5009
	FBgn0036952	CG6933	5.76681	29	0.5018
	FBgn0030594	fiz	8.70323	43	0.502
	FBgn0003067	Pepck1	15.026	72	0.5026
	FBgn0004509	Fur1	462.338	2030	0.5027
	FBgn0037283	CG14658	0.0989774	1	0.5034
	FBgn0038208	CG14355	8.67914	43	0.5034
	FBgn0033688	Prp8	1.23573	7	0.5043
	FBgn0036915	Prp3	1.84185	10	0.5048
	FBgn0052351	S-Lap2	5.21569	27	0.5062
	FBgn0025865	Cortactin	8.92537	44	0.5065
	FBgn0019972	Drice	5.28158	27	0.5069
	FBgn0031585	CG2955	13.9089	68	0.507
	FBgn0005649	Rox8	7.13449	36	0.5074
	FBgn0036108	Cpr67Fa1	1.02982	6	0.5077
	FBgn0036624	RAF2	5.20949	27	0.5094
	FBgn0050440	CG30440	79.3802	363	0.5099
	FBgn0053002	mRpL27	3.16124	17	0.5101
	FBgn0010295	ng3	0.814161	5	0.5116
	FBgn0050365	spaw	2.17805	12	0.5128
	FBgn0010051	Itp-r83A	12.9363	63	0.5134
	FBgn0052528	parvin	2.56029	14	0.5136
	FBgn0004698	Xpc	10.1388	50	0.5141
	FBgn0011225	jar	16.2713	79	0.5141
	FBgn0038359	CG5614	3.86402	20	0.5163
	FBgn0028982	Spt6	7.92531	40	0.5168
	FBgn0033364	CG13747	2.96127	16	0.5168
	FBgn0011763	Dp	7.00292	36	0.5178
	FBgn0010433	ato	0.614393	4	0.5197
	FBgn0010482	l(2)01289	23.0495	111	0.5207
	FBgn0034601	CG4286	5.34927	28	0.5229
	FBgn0032790	CG10194	3.32144	18	0.5245
	FBgn0000492	Dr	22.2377	108	0.5248
	FBgn0051029	CG31029	13.6865	68	0.5248
	FBgn0036911	Fibp	0.981554	6	0.5262
	FBgn0033260	Cul4	3.70485	20	0.5263
	FBgn0263235	Phae2	4.76954	25	0.5264
	FBgn0259247	stw	71.7806	336	0.5272
	FBgn0250906	Pgk	17.9756	88	0.5275
	FBgn0033438	Mmp2	183.616	831	0.5282
	FBgn0263755	Su(var)3-9	2.33039	13	0.5282
	FBgn0037435	CG18048	1.52094	9	0.5288
	FBgn0024985	CG11448	2.50562	14	0.5295
	FBgn0011202	dia	11.9758	60	0.5296
	FBgn0034986	mRpS17	2.70612	15	0.5302
	FBgn0028515	EndoGI	5.07505	27	0.5306
	FBgn0038546	CG7379	0.612106	4	0.5307
	FBgn0024248	chico	12.0673	60	0.5309
	FBgn0037962	Dnali1	0.96689	6	0.5311
	FBgn0034282	Mapmodulin	6.50635	34	0.5329
	FBgn0038934	Gld2	6.55463	34	0.5332
	FBgn0034901	CG11300	1.53834	9	0.5336
	FBgn0000182	BicC	20.9117	103	0.534
	FBgn0036311	CG17666	7.46489	39	0.5344
	FBgn0035823	eIF4E5	1.89105	11	0.5363
	FBgn0020257	Ppa	5.46753	29	0.5396
	FBgn0020887	Su(z)12	3.99528	22	0.5401
	FBgn0033868	S-Lap7	3.25764	18	0.5401
	FBgn0264001	bru3	718.006	3183	0.5405
	FBgn0061197	CG13164	7.65558	40	0.541
	FBgn0035102	CG7049	0.23995	2	0.5418
	FBgn0039157	Myo95E	11.2464	58	0.5424
	FBgn0031711	CG6907	1.88188	11	0.5435
	FBgn0041781	SCAR	10.688	55	0.5437
	FBgn0039280	Mocs2B	1.12919	7	0.544
	FBgn0034133	knon	12.7605	65	0.5441
	FBgn0050457	CG30457	2.2134	13	0.5443
	FBgn0010531	Ccs	0.750167	5	0.5449
	FBgn0026315	Ugt35a	5.72415	31	0.5449
	FBgn0036785	CG13700	10.1171	52	0.545
	FBgn0022382	Pka-R2	81.4311	385	0.5457
	FBgn0037421	CG15594	2.41164	14	0.5459
	FBgn0004169	up	11.1407	57	0.5461
	FBgn0001983	wor	5.35837	29	0.5462
	FBgn0013348	TpnC41C	8.7774	46	0.5464
	FBgn0038376	Hmt-1	6.96991	37	0.5467
	FBgn0024183	vig	12.0667	62	0.5475
	FBgn0038163	CG10841	8.22164	43	0.5478
	FBgn0003117	pnr	41.6524	200	0.5479
	FBgn0036159	CG7557	6.13881	33	0.5486
	FBgn0052473	CG32473	39.9744	193	0.5498
	FBgn0037657	hyx	3.96792	22	0.5499
	FBgn0036465	Rpn12R	3.37118	19	0.5505
	FBgn0028539	Eato	4.98305	27	0.5512
	FBgn0030877	Arp8	0.92058	6	0.5521
	FBgn0030773	CG9676	4.81506	26	0.5524
	FBgn0036438	goddard	0.0805762	1	0.5524
	FBgn0032624	CG6304	1.63691	10	0.5529
	FBgn0015754	Lis-1	11.2517	58	0.5536
	FBgn0260397	Su(var)3-3	2.24603	13	0.5537
	FBgn0011655	Med	5.23789	29	0.5543
	FBgn0264492	CkIIalpha	3.95233	22	0.5548
	FBgn0015019	CCT3	0.392009	3	0.5549
	FBgn0033280	CG12126	1.28766	8	0.5553
	FBgn0002569	Mal-A2	1.78958	11	0.5554
	FBgn0031698	Ncoa6	7.51724	40	0.5558
	FBgn0031449	CG31689	62.6465	301	0.5572
	FBgn0005536	Mbs	91.5537	433	0.5573
	FBgn0031431	CG3515	9.08525	48	0.5577
	FBgn0004143	nullo	1.46031	9	0.5585
	FBgn0264357	SNF4Agamma	341.459	1555	0.5586
	FBgn0010551	Phb2	12.3306	64	0.5587
	FBgn0004047	Yp3	2.57856	15	0.5595
	FBgn0027093	ArgRS	3.89314	22	0.5602
	FBgn0262782	Mdh1	2.75682	16	0.5632
	FBgn0037137	Nopp140	2.15976	13	0.5639
	FBgn0039016	Dcr-1	21.7193	109	0.5639
	FBgn0003042	Pc	1.08291	7	0.564
	FBgn0040207	kat80	39.5235	195	0.5645
	FBgn0014037	Su(Tpl)	16.3527	83	0.5647
	FBgn0041111	lilli	263.608	1211	0.5647
	FBgn0020261	pcm	6.01081	33	0.5648
	FBgn0050372	Asap	7.19996	39	0.565
	FBgn0051716	Cnot4	11.29	59	0.5651
	FBgn0005655	PCNA	2.68332	16	0.5659
	FBgn0030687	RpIIIC160	9.76191	52	0.568
	FBgn0034605	CG15661	17.5761	90	0.5688
	FBgn0000147	aurA	3.7066	21	0.5689
	FBgn0264672	Eogt	4.9149	28	0.5709
	FBgn0013343	Syx1A	1.46365	9	0.571
	FBgn0250845	CG1288	0.549726	4	0.5714
	FBgn0015277	Pi3K59F	13.6477	72	0.5727
	FBgn0002783	mor	3.85706	22	0.5729
	FBgn0261873	sdt	155.946	729	0.573
	FBgn0014024	Rnp4F	8.3505	45	0.5742
	FBgn0004636	Rap1	3.83245	22	0.5743
	FBgn0023509	mip130	5.75392	32	0.5745
	FBgn0003996	w	11.4796	61	0.5748
	FBgn0032863	Cdc23	1.04773	7	0.5749
	FBgn0264855	AP-2alpha	6.71913	37	0.5749
	FBgn0024277	trio	193.009	900	0.5754
	FBgn0024234	gbb	2.48156	15	0.5761
	FBgn0023388	Dap160	2.87324	17	0.5762
	FBgn0250786	Chd1	18.4786	95	0.5762
	FBgn0022772	Orc1	3.05139	18	0.5779
	FBgn0039644	rdog	19.5675	101	0.5793
	FBgn0001297	kay	139.252	659	0.5801
	FBgn0033926	Arc1	2.45035	15	0.5803
	FBgn0029861	CG3815	6.06471	34	0.581
	FBgn0001104	Galphai	25.9278	131	0.5811
	FBgn0030319	CG2533	0.0659555	1	0.5819
	FBgn0035915	S-Lap1	3.19879	19	0.582
	FBgn0003339	Scr	50.1775	246	0.5821
	FBgn0051204	CG31204	6.0104	34	0.5826
	FBgn0265269	CG15425	3.75733	22	0.5826
	FBgn0003015	osk	1.71783	11	0.5836
	FBgn0033897	Rcd1	7.40094	41	0.5848
	FBgn0010226	GstS1	14.8808	79	0.5855
	FBgn0032908	CG9270	8.48087	46	0.5855
	FBgn0039083	CG10177	4.12656	24	0.586
	FBgn0015949	hrg	9.27625	51	0.5869
	FBgn0032812	Hakai	3.55837	21	0.5878
	FBgn0262562	CG43102	80.6693	391	0.588
	FBgn0004915	TfIIB	3.1334	19	0.5885
	FBgn0262601	SmB	3.5365	21	0.5885
	FBgn0014366	noi	0.360067	3	0.589
	FBgn0002622	RpS3	2.23007	14	0.591
	FBgn0031526	CG8838	1.86026	12	0.591
	FBgn0027509	TBCD	10.7972	58	0.5912
	FBgn0031559	CG3513	2.90753	18	0.5915
	FBgn0036708	CG13725	1.51247	10	0.5916
	FBgn0030778	CG4678	65.9121	321	0.5922
	FBgn0035742	Acbp4	0.201166	2	0.5925
	FBgn0032796	CG10188	8.89765	49	0.5929
	FBgn0011573	Cdc37	3.66687	22	0.5968
	FBgn0032590	CG4631	15.2128	81	0.5978
	FBgn0001098	Gdh	27.3883	140	0.5985
	FBgn0027569	cert	19.6546	103	0.5991
	FBgn0031249	CG11911	0.197606	2	0.6008
	FBgn0026089	CG14817	0.491554	4	0.6025
	FBgn0011217	eff	11.9577	65	0.6026
	FBgn0001091	Gapdh1	1.15909	8	0.6031
	FBgn0050039	CG30039	2.54306	16	0.6044
	FBgn0039104	CG10252	0.819175	6	0.6048
	FBgn0033279	CG2291	2.85975	18	0.6053
	FBgn0040372	G9a	2.02719	13	0.6058
	FBgn0003721	Tm1	56.1338	280	0.6072
	FBgn0026741	mRpL18	0.967913	7	0.6076
	FBgn0037046	CG10581	0.484582	4	0.6098
	FBgn0010315	CycD	0.326116	3	0.6118
	FBgn0032005	Snx6	8.46769	48	0.6132
	FBgn0052091	CG32091	72.0623	358	0.6135
	FBgn0000490	dpp	100.34	495	0.6146
	FBgn0086558	Ubi-p5E	0.325693	3	0.6159
	FBgn0261823	Asx	13.0284	72	0.6167
	FBgn0034665	CG4372	5.75194	34	0.6179
	FBgn0036925	schuy	1.26408	9	0.6179
	FBgn0024236	foi	28.4423	149	0.6181
	FBgn0030087	CG7766	11.8308	66	0.6181
	FBgn0035766	eco	14.231	78	0.6184
	FBgn0038123	CG8508	2.83731	18	0.6185
	FBgn0001147	gsb-n	13.3279	73	0.619
	FBgn0086129	snama	10.9952	61	0.6199
	FBgn0030433	mRpL49	0.775414	6	0.6217
	FBgn0261885	osa	51.9385	263	0.6218
	FBgn0028531	CG15286	2.3129	15	0.6226
	FBgn0001624	dlg1	66.0614	332	0.6241
	FBgn0015000	betaggt-I	8.93915	51	0.6247
	FBgn0039471	CG6295	3.01209	19	0.6257
	FBgn0036246	CG17154	3.13485	20	0.6258
	FBgn0002773	Mlc2	4.6793	29	0.6261
	FBgn0003165	pum	317.296	1498	0.6268
	FBgn0031476	CG8813	2.43973	16	0.6269
	FBgn0039710	dgt1	3.69989	23	0.6277
	FBgn0030283	CG15198	0.939632	7	0.6285
	FBgn0264075	tgo	1.41328	10	0.6289
	FBgn0035335	mRpL23	1.2587	9	0.629
	FBgn0038598	CG7131	10.7074	61	0.6296
	FBgn0039464	CG6330	31.7681	168	0.6296
	FBgn0004171	Mst98Cb	0.0488649	1	0.6297
	FBgn0033017	CG10465	0.447495	4	0.6299
	FBgn0038923	mRpL35	3.08901	20	0.6299
	FBgn0033352	PAN2	2.05555	14	0.6312
	FBgn0036497	Ran-like	0.920921	7	0.6325
	FBgn0032846	CG10721	3.08401	20	0.633
	FBgn0011211	blw	4.9034	30	0.6346
	FBgn0014869	Pglym78	6.18194	37	0.6351
	FBgn0024957	Irp-1B	5.43279	33	0.6359
	FBgn0052594	be	27.3437	146	0.6374
	FBgn0028476	Usp1	14.3234	80	0.6376
	FBgn0051002	CG31002	2.37814	16	0.6396
	FBgn0086907	Cyt-c-d	7.69124	46	0.6397
	FBgn0039883	RhoGAP100F	36.2009	191	0.6399
	FBgn0259978	vlc	1.70336	12	0.6419
	FBgn0004644	hh	38.6932	204	0.6422
	FBgn0261547	Exn	80.5696	409	0.6422
	FBgn0083940	RhoU	134.5	662	0.6426
	FBgn0027073	CG4302	9.45055	55	0.6431
	FBgn0032321	YL-1	3.61019	23	0.6433
	FBgn0263391	hts	58.4344	299	0.6434
	FBgn0034904	CG15800	3.23261	21	0.6451
	FBgn0011591	fng	27.9363	150	0.6461
	FBgn0034691	Synj	23.2151	127	0.6466
	FBgn0017550	Rga	0.713588	6	0.6477
	FBgn0029969	CG10932	2.18335	15	0.6483
	FBgn0023507	D2hgdh	2.88167	19	0.6484
	FBgn0010583	dock	14.1069	80	0.6485
	FBgn0265089	eIF4E3	4.94319	31	0.6489
	FBgn0011604	Iswi	8.18239	49	0.649
	FBgn0027503	CG11970	5.65334	35	0.6492
	FBgn0036109	Cpr67Fa2	1.17731	9	0.6494
	FBgn0263740	eIF2gamma	3.95888	25	0.6497
	FBgn0086679	p	2.01012	14	0.6516
	FBgn0032360	CG14926	2.35195	16	0.6532
	FBgn0033526	Caf1-105	9.99348	59	0.654
	FBgn0004635	rho	14.8333	84	0.6541
	FBgn0017556	Prosalpha4T2	3.49525	23	0.655
	FBgn0028903	CG13243	1.64635	12	0.6559
	FBgn0034842	Prosbeta5R1	3.83697	25	0.6559
	FBgn0052523	CG32523	2.31626	16	0.656
	FBgn0036698	CG7724	6.8937	42	0.6564
	FBgn0053198	pen-2	4.52659	29	0.6564
	FBgn0036125	Iyd	7.52982	46	0.6566
	FBgn0035603	Pfdn4	1.99096	14	0.6569
	FBgn0053193	sav	10.3887	61	0.6582
	FBgn0001215	Hrb98DE	12.1511	71	0.6589
	FBgn0033183	CG1620	1.17632	9	0.6589
	FBgn0004838	Hrb27C	8.00009	48	0.6591
	FBgn0036257	RhoGAP68F	13.4854	77	0.6594
	FBgn0039555	mRpS22	2.13693	15	0.6597
	FBgn0033342	CCT8	0.70465	6	0.6604
	FBgn0260799	p120ctn	12.7749	74	0.6606
	FBgn0261617	nej	15.9671	91	0.6608
	FBgn0025781	Cdc16	5.95589	37	0.6613
	FBgn0003145	prd	9.92267	59	0.6619
	FBgn0011286	RyR	31.1873	170	0.6619
	FBgn0034467	CG15128	3.93902	26	0.6623
	FBgn0035016	CG4612	1.20205	9	0.6623
	FBgn0011296	l(2)efl	3.09119	21	0.6629
	FBgn0033285	CG18449	0.145107	2	0.663
	FBgn0034294	Muc55B	3.76926	25	0.6631
	FBgn0014028	SdhB	0.270094	3	0.6632
	FBgn0015795	Rab7	4.8213	31	0.6636
	FBgn0037879	scpr-C	0.275517	3	0.6648
	FBgn0000229	bsk	6.1289	38	0.6656
	FBgn0036015	CG3088	2.7311	19	0.6658
	FBgn0086519	Cpr47Eg	0.546902	5	0.6659
	FBgn0016797	fz2	260.556	1267	0.667
	FBgn0024836	stan	183.199	908	0.6674
	FBgn0041156	exex	14.9032	86	0.6674
	FBgn0000308	chic	23.9534	134	0.6707
	FBgn0038691	CG5250	1.44395	11	0.6715
	FBgn0030672	CG9281	2.56718	18	0.6722
	FBgn0033029	Not3	5.66914	36	0.6724
	FBgn0037502	wa-cup	2.23104	16	0.6728
	FBgn0034816	CG3085	6.18452	39	0.6729
	FBgn0040252	Ugt86Dh	1.28264	10	0.6744
	FBgn0028513	CG9254	0.530528	5	0.6758
	FBgn0035709	eIF4E4	1.88132	14	0.6759
	FBgn0036328	CG10749	1.55995	12	0.6765
	FBgn0040075	rept	2.21218	16	0.6768
	FBgn0031317	Charon	3.03361	21	0.6773
	FBgn0038892	CG15498	5.4567	35	0.6773
	FBgn0026755	Ugt37b1	6.07152	39	0.6774
	FBgn0002673	twe	1.54561	12	0.6783
	FBgn0003209	raw	118.098	600	0.6788
	FBgn0016697	Prosalpha5	0.255482	3	0.6792
	FBgn0037987	CG14739	0.669812	6	0.6798
	FBgn0003334	Scm	2.51579	18	0.6799
	FBgn0024291	Sirt1	2.04161	15	0.6799
	FBgn0027560	Tps1	15.1084	89	0.6803
	FBgn0023091	dimm	13.9258	83	0.6805
	FBgn0259174	Nedd4	22.0076	125	0.6809
	FBgn0002791	mr	4.64507	31	0.6812
	FBgn0004101	bs	55.2717	296	0.6812
	FBgn0004860	ph-d	0.52009	5	0.682
	FBgn0033954	CG12860	1.24963	10	0.682
	FBgn0032849	mRpS18B	1.68248	13	0.6822
	FBgn0033860	S-Lap5	4.75708	31	0.6825
	FBgn0264325	Atg6	2.19352	16	0.6827
	FBgn0038334	h-cup	1.28449	10	0.683
	FBgn0034366	Atg7	23.7793	135	0.6833
	FBgn0036334	CG11267	2.51872	18	0.6845
	FBgn0013750	Arf51F	0.517269	5	0.6858
	FBgn0039349	Ssadh	2.02143	15	0.6871
	FBgn0031513	CG3347	11.6025	70	0.6873
	FBgn0052064	S-Lap4	3.79837	26	0.6877
	FBgn0026181	Rok	18.4206	107	0.6878
	FBgn0033155	Br140	5.36227	35	0.6879
	FBgn0011766	E2f1	90.8965	478	0.6882
	FBgn0028379	fan	0.132895	2	0.6887
	FBgn0031574	TTLL4B	15.9551	94	0.6898
	FBgn0035240	CG33791	82.9191	434	0.6905
	FBgn0014879	Set	2.49544	18	0.6906
	FBgn0039358	CG5028	2.50587	18	0.6907
	FBgn0002862	Mst87F	0.646157	6	0.6912
	FBgn0004389	bnk	1.35345	11	0.6912
	FBgn0041789	Pax	78.143	411	0.6915
	FBgn0000158	bam	2.12337	16	0.6918
	FBgn0036222	SdhAL	8.05605	51	0.6928
	FBgn0052026	CG32026	9.36727	58	0.6929
	FBgn0033554	Lsm10	0.505679	5	0.6939
	FBgn0038790	MtnC	1.5011	12	0.694
	FBgn0026238	gus	19.5395	115	0.6949
	FBgn0028544	CG16884	12.0814	74	0.6949
	FBgn0053276	Urm1	5.42984	36	0.6959
	FBgn0034612	CG10505	24.8519	142	0.6971
	FBgn0034921	DCP1	0.248794	3	0.6973
	FBgn0038979	tHMG2	1.22987	10	0.6973
	FBgn0030121	Cfp1	1.20478	10	0.699
	FBgn0030278	CG15200	1.35993	11	0.699
	FBgn0036393	CG17362	1.7991	14	0.6991
	FBgn0027951	MTA1-like	6.90284	45	0.6997
	FBgn0003300	run	5.22352	35	0.7
	FBgn0003884	alphaTub84B	0.491194	5	0.7007
	FBgn0011206	bol	71.8786	386	0.7019
	FBgn0029718	mRpL30	0.232607	3	0.702
	FBgn0004649	yl	17.2663	102	0.7025
	FBgn0038797	Dic2	4.53844	31	0.7025
	FBgn0086254	CG6084	10.8376	67	0.7027
	FBgn0031240	CG3345	0.745046	7	0.7046
	FBgn0261068	LSm7	0.484745	5	0.7048
	FBgn0034274	CG10931	1.9271	15	0.7049
	FBgn0032632	CG6380	1.61607	13	0.7054
	FBgn0010389	htl	35.3819	199	0.7059
	FBgn0004107	Cdk2	4.53489	31	0.7072
	FBgn0001138	grn	38.568	215	0.7077
	FBgn0260634	eIF4G2	5.66517	38	0.7087
	FBgn0000114	bru1	682.432	3301	0.7091
	FBgn0036918	Pfdn6	1.03137	9	0.7092
	FBgn0039130	CG5854	2.23001	17	0.7095
	FBgn0028387	chm	33.9497	192	0.7104
	FBgn0038976	Pfdn5	0.602543	6	0.7108
	FBgn0004066	Prosalpha4	0.742203	7	0.7123
	FBgn0000543	ecd	6.56002	43	0.7125
	FBgn0035196	CG9129	3.18159	23	0.7145
	FBgn0262614	pyd	163.687	844	0.7145
	FBgn0024371	E2f2	0.728429	7	0.7147
	FBgn0014018	Rel	2.1875	17	0.7148
	FBgn0035147	Gale	7.02263	46	0.7152
	FBgn0044826	Pak3	8.36156	54	0.7156
	FBgn0259785	pzg	1.17105	10	0.7158
	FBgn0050268	CG30268	17.4735	106	0.7184
	FBgn0004861	ph-p	0.463023	5	0.7198
	FBgn0025463	Bap60	1.00059	9	0.7202
	FBgn0029752	TrxT	0.335589	4	0.7224
	FBgn0031902	Wnt6	53.5438	294	0.7228
	FBgn0261804	CG42750	339.762	1701	0.7246
	FBgn0014857	His3.3A	0.725299	7	0.7248
	FBgn0038690	CG11703	2.00402	16	0.7264
	FBgn0001148	gsb	2.44103	19	0.7265
	FBgn0038016	MBD-R2	3.21109	24	0.7276
	FBgn0034505	CG16739	3.36416	25	0.7277
	FBgn0000057	adp	2.61802	20	0.728
	FBgn0039207	CG5789	24.9376	147	0.7285
	FBgn0000320	eya	72.7425	397	0.729
	FBgn0037376	Hat1	0.703409	7	0.729
	FBgn0050390	Sgf29	5.3126	37	0.7295
	FBgn0032935	Atg18b	3.478	26	0.7297
	FBgn0010501	Dcp-1	2.88362	22	0.7314
	FBgn0031232	CG11617	0.564067	6	0.7319
	FBgn0005592	btl	32.5866	190	0.7329
	FBgn0015808	ScpX	0.830533	8	0.7344
	FBgn0260945	Atg1	64.9474	358	0.7345
	FBgn0052133	Ptip	12.0882	77	0.7347
	FBgn0031367	c-cup	1.82395	15	0.7352
	FBgn0037607	CG8036	2.15458	17	0.7353
	FBgn0261268	Cul3	9.12502	61	0.7364
	FBgn0032997	CG17486	0.682554	7	0.7366
	FBgn0037064	CG9389	0.55483	6	0.7369
	FBgn0000588	esc	10.8972	71	0.7371
	FBgn0036921	RhoGDI	2.22991	18	0.7376
	FBgn0262716	Arp3	0.563891	6	0.7383
	FBgn0040066	wds	1.22031	11	0.7385
	FBgn0033020	COX4L	0.0229573	1	0.7397
	FBgn0032269	w-cup	6.37507	44	0.74
	FBgn0032588	CG5968	0.937715	9	0.74
	FBgn0028567	robl62A	1.49536	13	0.7419
	FBgn0001085	fz	337.511	1707	0.7429
	FBgn0259481	Mob2	184.275	963	0.7432
	FBgn0022764	Sin3A	20.6482	126	0.7435
	FBgn0026761	Trap1	1.49151	13	0.7441
	FBgn0052732	Setd3	21.2567	131	0.7445
	FBgn0262737	mub	101.501	551	0.7452
	FBgn0039735	Nph	1.75618	15	0.7454
	FBgn0020510	Abi	9.96933	66	0.746
	FBgn0261791	SNRPG	0.0957497	2	0.7463
	FBgn0011715	Snr1	1.48288	13	0.7464
	FBgn0019949	Cdk9	1.32131	12	0.7483
	FBgn0034461	CG15124	0.546275	6	0.75
	FBgn0034356	Pepck2	34.096	202	0.7507
	FBgn0004391	shtd	11.8176	77	0.7514
	FBgn0031651	mRpL24	2.47296	20	0.7521
	FBgn0038740	CG4562	13.2391	86	0.7531
	FBgn0023518	trr	2.2872	19	0.7534
	FBgn0030191	CG15306	1.44201	13	0.7534
	FBgn0000299	Col4a1	7.8164	54	0.754
	FBgn0011761	dhd	0.533078	6	0.7549
	FBgn0032636	CG5043	1.7141	15	0.7549
	FBgn0026192	par-6	4.09161	31	0.755
	FBgn0001075	ft	138.423	740	0.7551
	FBgn0002932	neur	28.3234	170	0.7552
	FBgn0011570	cpb	3.82024	29	0.7553
	FBgn0000382	csw	28.402	172	0.7556
	FBgn0000250	cact	26.9566	164	0.7558
	FBgn0034464	CG11018	3.66217	28	0.7559
	FBgn0031128	hydra	2.74696	22	0.7563
	FBgn0014023	mRpL47	0.0912891	2	0.7565
	FBgn0010100	mAcon1	0.401349	5	0.7568
	FBgn0032293	Dpy-30L1	0.188376	3	0.7573
	FBgn0015776	nrv1	22.7793	140	0.7578
	FBgn0051155	Rpb7	0.769197	8	0.7584
	FBgn0045827	CG13245	1.28646	12	0.7588
	FBgn0033423	Alp6	2.46239	20	0.7589
	FBgn0040091	Ugt58Fa	2.2736	19	0.759
	FBgn0036014	CG3222	3.30971	26	0.7591
	FBgn0038523	CG7587	1.5669	14	0.7594
	FBgn0028894	GMF	2.11329	18	0.7597
	FBgn0038747	RhoGAP92B	14.4685	94	0.7597
	FBgn0002521	pho	1.85253	16	0.7603
	FBgn0000504	dsx	57.3836	326	0.7606
	FBgn0038694	CG5217	2.39903	20	0.7614
	FBgn0005558	ey	5.96174	43	0.7623
	FBgn0035290	dsb	52.7434	304	0.7623
	FBgn0250844	CG4218	6.54686	47	0.7636
	FBgn0031545	CG3213	7.2225	51	0.7637
	FBgn0037411	Osi3	1.30841	12	0.7638
	FBgn0010741	Pfdn2	1.14728	11	0.764
	FBgn0029939	CG9650	112.919	616	0.7641
	FBgn0002931	net	1.87096	16	0.7647
	FBgn0004592	Eig71Ee	2.73616	22	0.7654
	FBgn0021825	DCTN2-p50	0.0849224	2	0.7654
	FBgn0024329	Mekk1	16.8959	108	0.7655
	FBgn0039925	Kif3C	8.91059	61	0.7659
	FBgn0014020	Rho1	4.48234	34	0.7666
	FBgn0030343	ATP7	13.7618	90	0.7669
	FBgn0031977	baf	0.276979	4	0.767
	FBgn0038701	CG18493	3.41344	27	0.7675
	FBgn0040011	Slmap	2.37676	20	0.7678
	FBgn0040963	CG18662	3.02009	24	0.7687
	FBgn0036882	CG9279	2.2725	19	0.7692
	FBgn0003270	amos	2.05801	18	0.7694
	FBgn0087040	alphaTub67C	11.1259	76	0.7698
	FBgn0038319	mRpL9	0.0874112	2	0.77
	FBgn0262699	fzr	31.9775	194	0.7712
	FBgn0032391	escl	0.0134525	1	0.7729
	FBgn0039622	eIF4E6	0.0157991	1	0.773
	FBgn0053653	Cadps	11.5014	78	0.7735
	FBgn0033287	CG8701	0.473225	6	0.7739
	FBgn0261065	Cpsf73	5.8853	43	0.7748
	FBgn0034423	tbrd-2	1.6515	15	0.7763
	FBgn0034144	CG5089	1.91381	17	0.7767
	FBgn0015838	Vang	1.76722	16	0.7774
	FBgn0000117	arm	3.53007	28	0.7775
	FBgn0051709	CG31709	1.23758	12	0.7777
	FBgn0036255	Atg12	0.600141	7	0.778
	FBgn0002775	msl-3	4.60023	35	0.7782
	FBgn0031437	Arpc5	0.714761	8	0.7782
	FBgn0262656	Myc	5.46166	41	0.7798
	FBgn0026756	Ugt37a1	1.2215	12	0.7807
	FBgn0035047	Pof	1.08318	11	0.7823
	FBgn0035997	phol	1.89473	17	0.7823
	FBgn0037750	Whamy	1.07967	11	0.7829
	FBgn0040262	Ugt36Ba	5.59858	42	0.7833
	FBgn0036437	CG5048	2.84479	24	0.7834
	FBgn0003375	Sgs5	1.93713	17	0.7836
	FBgn0039972	CG17018	75.8776	436	0.7836
	FBgn0038083	CG5999	5.52985	42	0.7841
	FBgn0003943	Ubi-p63E	2.75943	23	0.7845
	FBgn0019650	toy	6.37361	47	0.7845
	FBgn0031129	CG1324	0.941904	10	0.785
	FBgn0005391	Yp2	1.46896	14	0.7854
	FBgn0038921	CG6332	4.98355	38	0.7871
	FBgn0037035	CG10589	0.257045	4	0.7874
	FBgn0002565	Lsp2	5.87032	44	0.7881
	FBgn0020616	SA	12.2087	84	0.7899
	FBgn0085188	CG34159	1.60985	15	0.7913
	FBgn0031036	CG14220	1.45505	14	0.7916
	FBgn0035988	CG3982	1.71559	16	0.7916
	FBgn0031516	CG9663	31.5427	198	0.7935
	FBgn0034205	CG10950	2.95996	25	0.7936
	FBgn0015765	p38a	1.854	17	0.7939
	FBgn0261790	SmE	1.03289	11	0.7944
	FBgn0033480	mRpL42	0.152314	3	0.7953
	FBgn0026563	CG1979	3.12888	26	0.7957
	FBgn0026374	Rhp	3.67027	30	0.7958
	FBgn0042710	Hex-t2	3.07176	26	0.7978
	FBgn0010352	Nc73EF	20.0141	131	0.7981
	FBgn0053970	CG33970	116.466	652	0.7984
	FBgn0040305	MTF-1	23.5229	153	0.7992
	FBgn0259209	Mlp60A	6.50424	48	0.8004
	FBgn0036181	Muc68Ca	5.78943	45	0.8014
	FBgn0024698	Cpsf160	4.73434	38	0.8015
	FBgn0037384	dgrn	1.03293	11	0.802
	FBgn0000014	abd-A	49.4087	297	0.8021
	FBgn0031728	Hsp60C	23.8556	155	0.8029
	FBgn0002772	Mlc1	3.29064	28	0.803
	FBgn0001108	DCTN1-p150	14.8204	101	0.8036
	FBgn0027582	CG6230	2.84255	25	0.8036
	FBgn0033698	CG8858	4.92527	39	0.8036
	FBgn0014454	Acp1	0.659334	8	0.8045
	FBgn0015777	nrv2	27.7219	178	0.8057
	FBgn0037985	ssp5	1.62702	16	0.8061
	FBgn0040502	CG8343	0.142438	3	0.8065
	FBgn0026059	Mhcl	48.6966	295	0.8066
	FBgn0039688	Kul	27.9799	179	0.8068
	FBgn0005666	bt	7.64237	57	0.8088
	FBgn0028852	CG15262	1.49879	15	0.809
	FBgn0011566	Smyd3	4.56602	37	0.8096
	FBgn0036487	Prp31	0.767804	9	0.8098
	FBgn0036766	CG5506	1.00198	11	0.81
	FBgn0028850	CG15260	2.29225	21	0.8102
	FBgn0020306	dom	27.4756	175	0.8104
	FBgn0038816	Lrrk	3.89779	33	0.8121
	FBgn0086446	DCTN6-p27	0.415236	6	0.8133
	FBgn0024920	Ts	1.89205	18	0.814
	FBgn0031323	CG5139	1.87966	18	0.8147
	FBgn0033888	CG18568	0.427624	6	0.8159
	FBgn0035491	Dpy-30L2	0.538764	7	0.8165
	FBgn0010382	CycE	72.7375	432	0.8166
	FBgn0033356	CG8229	0.867572	10	0.8169
	FBgn0036225	CG5883	1.36139	14	0.8174
	FBgn0004432	Cyp1	1.206	13	0.819
	FBgn0032464	Vha68-3	5.78063	46	0.8195
	FBgn0004173	Mst84Db	0.0597032	2	0.8198
	FBgn0036596	CG13045	1.9493	19	0.8199
	FBgn0025573	PpN58A	3.77854	32	0.8203
	FBgn0038978	tHMG1	0.00853499	1	0.8208
	FBgn0000711	flw	38.0319	240	0.8212
	FBgn0032878	CG9316	3.18856	28	0.8213
	FBgn0041585	olf186-F	71.8993	428	0.8214
	FBgn0025716	Bap55	0.216477	4	0.8219
	FBgn0028494	CG6424	43.6631	274	0.8219
	FBgn0015756	RpL9	1.69665	17	0.8225
	FBgn0021776	mira	3.58192	31	0.8225
	FBgn0039827	CG1544	17.0646	119	0.8225
	FBgn0032371	CG4983	2.57169	24	0.8226
	FBgn0031820	Daxx	14.22	101	0.8237
	FBgn0039461	CG5500	8.03993	61	0.8249
	FBgn0025697	santa-maria	29.232	191	0.8251
	FBgn0037255	Fip1	0.0567955	2	0.8253
	FBgn0036239	Pop2	1.73459	17	0.8256
	FBgn0033773	Mos	2.1103	20	0.826
	FBgn0003942	RpS27A	1.43209	15	0.8273
	FBgn0052683	CG32683	92.677	548	0.8273
	FBgn0031906	CG5160	37.4745	238	0.8281
	FBgn0026597	Axn	61.3311	375	0.8299
	FBgn0011723	byn	38.1372	243	0.8303
	FBgn0001086	fzy	3.04786	28	0.8305
	FBgn0032444	CCT4	6.68719	53	0.831
	FBgn0028902	Tektin-A	2.95461	27	0.8311
	FBgn0002914	Myb	0.202591	4	0.8315
	FBgn0013300	ProtA	2.94596	27	0.8344
	FBgn0037687	CG8132	0.391428	6	0.8348
	FBgn0031995	CG8475	16.1489	115	0.8349
	FBgn0000256	capu	158.962	901	0.8377
	FBgn0019947	Psn	0.912676	11	0.8378
	FBgn0029997	CG2258	13.4031	98	0.8379
	FBgn0032424	CG17010	4.64582	40	0.8419
	FBgn0037420	CG15597	0.00494282	1	0.8421
	FBgn0039071	bb8	3.55826	32	0.8421
	FBgn0003392	shi	18.7331	131	0.8423
	FBgn0031999	CG8419	6.53219	53	0.8426
	FBgn0031443	Prosbeta4R2	3.58491	32	0.8443
	FBgn0040071	tara	47.9638	305	0.8455
	FBgn0031723	CG7251	1.45346	16	0.8461
	FBgn0085451	htk	17.7009	126	0.8464
	FBgn0032538	CG16885	2.69229	26	0.8466
	FBgn0086915	Mst77F	0.113509	3	0.8475
	FBgn0036997	CG5955	1.77944	19	0.8494
	FBgn0032821	CdGAPr	27.1579	183	0.8499
	FBgn0034194	CG15611	18.4829	133	0.8504
	FBgn0037939	CG14718	0.270659	5	0.8508
	FBgn0032329	Art8	1.92342	20	0.8515
	FBgn0262714	Sap130	9.08834	71	0.8522
	FBgn0020251	sfl	160.241	928	0.8541
	FBgn0031876	Atac1	2.38178	24	0.8543
	FBgn0031058	CG14227	1.18323	14	0.8546
	FBgn0016131	Cdk4	12.1717	93	0.8556
	FBgn0263832	Rcd5	0.851531	11	0.8556
	FBgn0028888	CG4168	100.834	607	0.8567
	FBgn0036537	CG18081	0.345554	6	0.8569
	FBgn0016685	Nlp	15.256	113	0.857
	FBgn0039532	Mtl	2.42649	25	0.8579
	FBgn0003525	stg	3.10714	30	0.8589
	FBgn0083969	CG34133	7.78186	64	0.8591
	FBgn0085201	CG34172	11.9306	92	0.8595
	FBgn0002921	Atpalpha	51.3855	330	0.8596
	FBgn0037391	CG2017	3.2469	31	0.8598
	FBgn0004117	Tm2	7.75586	64	0.8601
	FBgn0029879	APC7	6.84412	57	0.8605
	FBgn0045770	S-Lap3	7.3023	60	0.8615
	FBgn0033166	Eaf	14.1251	106	0.862
	FBgn0000629	E(z)	10.1555	80	0.8624
	FBgn0051759	CG31759	9.07378	73	0.8624
	FBgn0024958	Irp-1A	6.64626	56	0.8627
	FBgn0036534	DCP2	2.11117	22	0.8629
	FBgn0031000	Muc18B	1.04077	13	0.8641
	FBgn0029952	CG12689	0.0381895	2	0.8643
	FBgn0260461	Rcd7	0.0385564	2	0.8643
	FBgn0037970	GC2	0.82184	11	0.8657
	FBgn0260642	Antp	114.328	687	0.8657
	FBgn0028789	Doc1	8.13397	67	0.8662
	FBgn0031946	CG7164	2.58535	26	0.8664
	FBgn0039792	CG2267	4.46138	41	0.8664
	FBgn0260749	Utx	11.3115	88	0.8669
	FBgn0023172	RhoGEF2	15.8648	120	0.867
	FBgn0038369	Arpc3A	0.332394	6	0.8671
	FBgn0263601	mib1	7.49828	63	0.8692
	FBgn0033286	CG2127	0.412833	7	0.8703
	FBgn0085327	CG34298	1.33872	16	0.8705
	FBgn0037419	Osi12	2.25852	24	0.8708
	FBgn0038134	wntD	0.407987	7	0.8715
	FBgn0025743	mbt	3.79644	36	0.872
	FBgn0086895	pea	4.06046	38	0.8723
	FBgn0051694	CG31694	16.642	124	0.8727
	FBgn0011648	Mad	45.163	300	0.8728
	FBgn0015799	Rbf	2.02895	22	0.8728
	FBgn0032505	CG16826	0.892886	12	0.8731
	FBgn0036479	CG13458	2.26839	24	0.8732
	FBgn0036842	CG3797	2.63145	27	0.8743
	FBgn0032388	CG6686	2.27657	24	0.875
	FBgn0260632	dl	25.8092	184	0.875
	FBgn0039938	Sox102F	10.0441	81	0.8759
	FBgn0025936	Eph	2.60924	26	0.876
	FBgn0010380	AP-1-2beta	2.55178	27	0.8762
	FBgn0261648	salm	30.123	212	0.8773
	FBgn0001291	Jra	0.865591	12	0.8778
	FBgn0051820	CG31820	1.17368	15	0.8779
	FBgn0026326	Mad1	0.467982	8	0.878
	FBgn0032720	mRpL13	1.41158	17	0.878
	FBgn0005386	ash1	2.60598	27	0.8789
	FBgn0031868	Rat1	5.36112	49	0.879
	FBgn0263705	Myo10A	81.0033	511	0.8791
	FBgn0031903	Wnt10	40.7576	278	0.8801
	FBgn0022959	yps	3.26037	32	0.881
	FBgn0015270	Orc2	1.86197	21	0.8813
	FBgn0042189	CG17376	1.58377	19	0.8816
	FBgn0051788	CG31788	0.146604	4	0.8833
	FBgn0032372	CG4988	1.06681	14	0.8834
	FBgn0000577	en	5.36478	49	0.884
	FBgn0001092	Gapdh2	0.03145	2	0.8848
	FBgn0029778	RhoGAP5A	2.44322	26	0.885
	FBgn0030775	CG9673	2.40142	26	0.8867
	FBgn0243512	puc	10.7703	88	0.8873
	FBgn0016054	phr6-4	1.11872	15	0.8883
	FBgn0262527	nsl1	3.34598	34	0.8893
	FBgn0261808	cu	8.85584	75	0.8894
	FBgn0036277	CG10418	1.0076	14	0.8897
	FBgn0031887	CG11289	6.89294	61	0.8898
	FBgn0030034	CG10555	5.59953	51	0.8923
	FBgn0263351	AP-2mu	2.21934	25	0.8923
	FBgn0011726	tsr	0.804671	12	0.8932
	FBgn0003499	sr	151.653	913	0.8933
	FBgn0035034	CG3565	0.446925	8	0.8946
	FBgn0000463	Dl	41.8805	292	0.8953
	FBgn0031814	retm	22.1496	166	0.8953
	FBgn0010379	Akt1	1.53029	19	0.8957
	FBgn0046873	Pif2	0.135327	4	0.8959
	FBgn0040078	pont	0.203651	5	0.8973
	FBgn0027836	Dgp-1	4.10587	41	0.8978
	FBgn0032637	CG5050	5.17105	49	0.899
	FBgn0031914	CG5973	28.751	211	0.8994
	FBgn0031531	CG8840	1.3021	17	0.9003
	FBgn0051988	CG31988	0.0656481	3	0.9007
	FBgn0031085	CG9570	0.266744	6	0.901
	FBgn0031762	CG9098	21.5033	164	0.9011
	FBgn0031905	gudu	6.15638	57	0.9015
	FBgn0264494	CG17646	62.2487	418	0.9026
	FBgn0020622	Pi3K21B	3.48707	36	0.9033
	FBgn0031169	CG1494	8.49656	75	0.9036
	FBgn0031170	ABCA	25.9591	193	0.9036
	FBgn0031736	CG11030	118.576	743	0.9039
	FBgn0052343	Atac3	1.27513	17	0.9041
	FBgn0051639	CG31639	1.964	24	0.9048
	FBgn0001981	esg	2.69372	30	0.9061
	FBgn0043471	kappaTry	1.37753	18	0.9067
	FBgn0025641	DAAM	26.0483	196	0.9071
	FBgn0038181	CG9297	21.2446	165	0.908
	FBgn0037529	mRpS9	8.96072	79	0.9081
	FBgn0033610	CG18335	1.24328	17	0.9089
	FBgn0015268	Nap1	2.4502	28	0.9094
	FBgn0011224	heph	169.476	1036	0.9097
	FBgn0051740	CG31740	0.565219	10	0.9102
	FBgn0036309	Hip1	7.01366	66	0.9117
	FBgn0036467	CG12310	0.731379	12	0.9122
	FBgn0020399	Mst89B	0.644505	11	0.9123
	FBgn0261797	Dhc64C	38.7691	280	0.9123
	FBgn0037377	CG1218	0.17914	5	0.9124
	FBgn0035724	CG10064	6.34775	60	0.913
	FBgn0051344	CG31344	1.84397	23	0.915
	FBgn0035956	Doc2	30.3795	228	0.9152
	FBgn0001120	gnu	0.457803	9	0.9155
	FBgn0004598	Fur2	9.27584	82	0.9156
	FBgn0011227	ox	0.0196833	2	0.9158
	FBgn0051559	CG31559	3.19073	35	0.9159
	FBgn0027553	NELF-B	1.88764	24	0.9164
	FBgn0263738	Ada2a	3.69039	40	0.9164
	FBgn0010549	l(2)03659	8.11439	74	0.9169
	FBgn0250837	dUTPase	0.727242	12	0.9171
	FBgn0037454	CG1137	0.374382	8	0.9173
	FBgn0031512	CG15404	0.457316	9	0.918
	FBgn0000439	Dfd	8.78597	79	0.9188
	FBgn0032456	MRP	49.6116	354	0.919
	FBgn0038082	CG5724	2.51715	30	0.9223
	FBgn0011692	pav	6.35013	62	0.9225
	FBgn0263757	Rpb4	3.69082	41	0.9226
	FBgn0004783	Ccp84Aa	0.0507671	3	0.9227
	FBgn0025683	CG3164	2.09474	26	0.9239
	FBgn0000591	E(spl)m8-HLH	0.610123	11	0.9258
	FBgn0010356	Taf5	1.0244	16	0.926
	FBgn0001942	eIF4A	2.46686	30	0.9265
	FBgn0010621	CCT5	0.144039	5	0.928
	FBgn0010355	Taf1	3.44943	39	0.9282
	FBgn0010590	Prosbeta1	0.834005	14	0.9285
	FBgn0031885	Mnn1	8.30215	77	0.9291
	FBgn0037632	CCT7	1.40761	20	0.9293
	FBgn0039229	Saf-B	4.85491	51	0.9294
	FBgn0036622	Agpat4	0.762745	13	0.9296
	FBgn0029943	Atg5	5.90237	60	0.9299
	FBgn0039734	Tace	6.00231	61	0.9299
	FBgn0032755	CG17344	1.00693	16	0.9302
	FBgn0026080	Tip60	0.140524	5	0.9304
	FBgn0003507	srp	27.1708	213	0.9305
	FBgn0027620	Acf	1.88311	25	0.9321
	FBgn0053107	CG33107	3.59062	41	0.9323
	FBgn0000251	cad	15.3431	131	0.9329
	FBgn0027788	Hey	1.43953	21	0.9331
	FBgn0263200	Galt	0.631292	12	0.9358
	FBgn0035855	CG7366	0.793812	14	0.9384
	FBgn0040087	p115	0.0787961	4	0.94
	FBgn0014849	Eig71Ei	0.38353	9	0.9411
	FBgn0031620	CG11929	13.9866	127	0.9411
	FBgn0000053	Gart	21.2317	176	0.9413
	FBgn0003124	polo	0.496965	11	0.9431
	FBgn0003277	RpII215	0.0394638	3	0.9431
	FBgn0020238	14-3-3epsilon	4.49148	51	0.9431
	FBgn0031734	CG11147	16.6914	145	0.9443
	FBgn0002561	l(1)sc	0.00741817	2	0.9473
	FBgn0004197	Ser	55.7504	410	0.9476
	FBgn0029946	CG15034	0.583061	12	0.9496
	FBgn0001137	grk	1.87948	27	0.9504
	FBgn0011787	mRpL12	0.161572	6	0.951
	FBgn0031661	Gmd	1.63541	25	0.951
	FBgn0040996	CG12617	0.0310495	3	0.9512
	FBgn0086906	sls	183.558	1204	0.9523
	FBgn0002121	l(2)gl	0.925833	17	0.9534
	FBgn0017430	Nelf-E	4.63004	54	0.9539
	FBgn0036932	CG14184	0.203386	7	0.9552
	FBgn0053516	dpr3	126.608	869	0.9553
	FBgn0001961	Arpc1	0.669126	14	0.9558
	FBgn0011770	Gip	0.37258	10	0.9575
	FBgn0261458	capt	10.9375	110	0.9599
	FBgn0005632	faf	2.57928	35	0.9603
	FBgn0038708	Scsalpha2	0.864469	17	0.9604
	FBgn0265298	SC35	0.415633	11	0.9605
	FBgn0014340	mof	0.86161	17	0.9611
	FBgn0034577	cpa	2.94247	40	0.9611
	FBgn0265262	Vha68-1	3.93522	49	0.9611
	FBgn0015271	Orc5	1.01104	19	0.9615
	FBgn0003941	RpL40	0.232327	8	0.9617
	FBgn0035397	CG11486	24.4916	213	0.9631
	FBgn0020443	eRF3	8.69336	92	0.9633
	FBgn0028868	CG4701	0.128748	6	0.9634
	FBgn0038206	twf	2.30852	34	0.9639
	FBgn0261789	SmD2	0.0180442	3	0.9656
	FBgn0004103	Pp1-87B	0.00112812	2	0.9662
	FBgn0032516	Ing5	0.0454401	4	0.9668
	FBgn0035488	CG11593	2.04451	32	0.9675
	FBgn0037500	CG17944	0.0152666	3	0.9679
	FBgn0000022	ac	0.00037999	2	0.968
	FBgn0051698	CG31698	0.560377	14	0.9685
	FBgn0263599	l(3)72Ab	7.04379	80	0.9687
	FBgn0000667	Actn	5.96992	71	0.9697
	FBgn0040064	yip2	3.44576	48	0.9709
	FBgn0042085	Bap170	1.38489	25	0.9712
	FBgn0001233	Hsp83	0.644393	16	0.9723
	FBgn0016977	spen	13.7693	140	0.9732
	FBgn0033168	CG11145	0.188239	8	0.9737
	FBgn0051184	LSm3	0.725813	17	0.9738
	FBgn0022238	lolal	1.20388	23	0.9743
	FBgn0026379	Pten	3.85564	53	0.9743
	FBgn0026136	CkIIbeta2	0.651741	16	0.975
	FBgn0029722	CG7024	0.436454	13	0.9758
	FBgn0031737	obst-E	6.74372	82	0.9758
	FBgn0004057	Zw	4.15172	57	0.9764
	FBgn0034110	Atg9	2.06235	34	0.9766
	FBgn0003372	Sgs1	1.84188	31	0.9772
	FBgn0053196	dpy	281.271	1899	0.9782
	FBgn0027490	D12	1.82382	32	0.9791
	FBgn0003460	so	16.4925	170	0.9794
	FBgn0032167	CG5853	16.507	170	0.9805
	FBgn0035675	CG6610	0.0501936	5	0.9807
	FBgn0086655	jing	173.362	1248	0.9807
	FBgn0034894	sigmar	3.17642	49	0.9809
	FBgn0261394	Prosalpha3	0.915413	21	0.9811
	FBgn0015790	Rab11	5.47551	73	0.9812
	FBgn0031639	mRpS2	0.275161	11	0.9834
	FBgn0033846	mip120	7.16141	93	0.9837
	FBgn0015509	Cul1	0.655674	18	0.9839
	FBgn0032859	Arpc2	7.40056	93	0.9842
	FBgn0030054	Caf1-180	2.97138	50	0.9856
	FBgn0014863	Mlp84B	0.442693	15	0.9859
	FBgn0031050	Arp10	0.261338	11	0.986
	FBgn0032677	CG5790	0.923552	22	0.9865
	FBgn0031800	CG9497	1.70875	34	0.9883
	FBgn0024227	aurB	1.67196	34	0.9889
	FBgn0028412	Mst33A	0.269345	12	0.9891
	FBgn0264695	Mhc	21.2934	230	0.9897
	FBgn0023213	eIF4G1	3.10847	52	0.9906
	FBgn0053340	CG33340	-0.0185024	2	0.9926
	FBgn0037709	CG8199	0.0923242	9	0.9936
	FBgn0058006	CG40006	72.3573	653	0.9938
	FBgn0038390	Rbf2	1.42191	33	0.9943
	FBgn0031515	CG9664	6.37765	103	0.9947
	FBgn0035850	Atg18a	1.90346	42	0.9947
	FBgn0031054	Ssu72	0.245127	14	0.995
	FBgn0000579	Eno	6.49758	100	0.9955
	FBgn0262467	Scox	0.106042	10	0.9957
	FBgn0000317	ck	21.7786	259	0.996
	FBgn0001125	Got2	4.68465	81	0.9971
	FBgn0260407	mRpS23	0.147134	14	0.9976
	FBgn0004110	tin	1.92441	47	0.9978
	FBgn0003090	pk	42.398	468	0.9979
	FBgn0032771	CG17349	2.91693	64	0.9983
	FBgn0033741	CG8545	1.54131	42	0.9986
	FBgn0004837	Su(H)	3.37764	74	0.9989
	FBgn0036162	Fum3	4.21798	88	0.9992
	FBgn0021796	Tor	3.97814	90	0.9995
	FBgn0031947	CG7154	2.21788	61	0.9996
	FBgn0051450	mRpS18A	-0.0942908	3	0.9998
